# Supplementary material for: Four new meridamycin congeners from Streptomyces sp. SR107
Source: Royal Society of Chemistry journal article supplement (doi:10.1039/c6ra09772c), 2016-01-01

Supporting information for

**Four new meridamycin congeners from *Streptomyces* sp. SR107**

Mengyujie Liu, Chunhua Lu, Yuemao Shen\*

Key Laboratory of Chemical Biology (Ministry of Education), School of Pharmaceutical Sciences, Shandong University, No. 44 West Wenhua Road, Jinan, Shandong 250012, P. R. China

E-mail: yshen@sdu.edu.cn; Tel: 086-531-88382108

## List of contents

|                                                                                                                         |         |
|-------------------------------------------------------------------------------------------------------------------------|---------|
| <b>Table S1:</b> $^1\text{H}$ and $^{13}\text{C}$ NMR data for <b>1</b> <sup>a</sup> and meridamycin <sup>b</sup> ..... | 3       |
| <b>Table S2:</b> NMR data for <b>2</b> (in $\text{CD}_3\text{OD}$ ).....                                                | .. 5    |
| <b>Figure S1:</b> Selected $^1\text{H}$ - $^1\text{H}$ COSY and HMBC correlations for <b>2</b> .....                    | 6       |
| <b>Table S3:</b> NMR data for <b>3</b> (in $\text{CD}_3\text{OD}$ ).....                                                | ..7     |
| <b>Figure S2:</b> Selected $^1\text{H}$ - $^1\text{H}$ COSY and HMBC correlations for <b>3</b> .....                    | 8       |
| <b>Table S4:</b> NMR data for <b>4</b> (in $\text{CD}_3\text{OD}$ ).....                                                | .....9  |
| <b>Figure S3:</b> Selected $^1\text{H}$ - $^1\text{H}$ COSY and HMBC correlations for <b>4</b> .....                    | 10      |
| <b>Table S5:</b> NMR data for <b>5</b> (in $\text{CD}_3\text{OD}$ ).....                                                | .....11 |
| <b>Figure S4:</b> Selected $^1\text{H}$ - $^1\text{H}$ COSY and HMBC correlations for <b>5</b> .....                    | 12      |

## NMR data

**Table S1:** <sup>1</sup>H and <sup>13</sup>C NMR data for **1<sup>a</sup>** and meridamycin<sup>b</sup>.

| Pos. | <b>1<sup>a</sup></b> |                 | <b>meridamycin<sup>b</sup></b> |                 |
|------|----------------------|-----------------|--------------------------------|-----------------|
|      | <sup>1</sup> H J= Hz | <sup>13</sup> C | <sup>1</sup> H J= Hz           | <sup>13</sup> C |
| 1    | 1.32 d (5.5)         | 18.2 (q)        | 1.33 d (6.2)                   | 22.5 (q)        |
| 2    | 3.86 m               | 71.9 (d)        | 3.82 m                         | 71.4 (d)        |
| 3    | 2.63 m               | 41.8 (d)        | 2.60 m                         | 41.3 (d)        |
| 3a   | 1.37 d (6.9)         | 23.0 (q)        | 1.29 d (6.5)                   | 17.6 (q)        |
| 4    | 5.60 d (13.2)        | 135.5 (d)       | 5.60 dd (1.2, 10.0)            | 134.8 (d)       |
| 5    |                      | 132.5 (s)       |                                | 132.0 (s)       |
| 5a   | 1.80 s               | 12.9(q)         | 1.77 d (1.2)                   | 12.4 (q)        |
| 6    | 5.38 m               | 82.1 (d)        | 5.36 dd (5.7, 9.4)             | 81.6 (d)        |
| 7    | 2.55 m               | 31.1 (t)        | 2.52 m                         | 30.8 (t)        |
|      |                      |                 | 2.66 m                         |                 |
| 8    | 5.62 m               | 118.6 (d)       | 5.63 dd (6.8, 7.4)             | 118.1 (d)       |
| 9    |                      | 148.5 (s)       |                                | 148.0 (s)       |
| 9a   | 2.08 m               | 23.4 (t)        | 2.05 m                         | 22.9 (t)        |
|      | 2.48 m               |                 | 2.44 m                         |                 |
| 9b   | 1.14 t (6.7)         | 14.8 (q)        | 1.11 t (7.5)                   | 14.3 (q)        |
| 10   | 4.14 m               | 78.6 (d)        | 4.11 dd (4.1, 4.5)             | 78.1 (d)        |
| 11   | 1.98 m               | 36.7 (d)        | 1.94 m                         | 36.2 (d)        |
| 11a  | 1.18 d (7.4)         | 14.4 (q)        | 1.94 d (7.4)                   | 13.8 (q)        |
| 12   | 1.52 m               | 44.4 (t)        | 1.50 m                         | 43.8 (t)        |
|      | 1.73 m               |                 | 1.60 m                         |                 |
| 13   | 2.68 m               | 30.7 (d)        | 2.70 m                         | 30.2 (d)        |
| 13a  | 1.08 d (5.2)         | 23.2 (q)        | 1.04 d (6.7)                   | 22.7 (q)        |
| 14   | 5.75 d (9.7)         | 130.5 (d)       | 5.72 d (9.7)                   | 130.0 (d)       |
| 15   |                      | 138.2(s)        |                                | 137.7 (s)       |
| 15a  | 1.82 s               | 14.2 (q)        | 1.79 d (1.2)                   | 13.7 (q)        |
| 16   | 4.77 m               | 73.6 (d)        | 4.74 dd (5.7, 6.0)             | 73.2 (d)        |
| 17   | 2.10 m               | 45.0 (t)        | 2.00 m                         | 44.5 (t)        |
|      | 2.34 m               |                 | 2.29 m                         |                 |
| 18   | 4.70 m               | 69.7 (d)        | 4.68 m                         | 69.2 (d)        |
| 19   | 1.92 m               | 43.5(t)         | 1.88 m                         | 43.0 (t)        |
|      | 2.27 m               |                 | 2.22 m                         |                 |
| 20   | 4.84 d (10.7)        | 72.8 (d)        | 4.80 m                         | 72.3 (d)        |
| 21   | 1.84 m               | 41.5 (d)        | 2.09 m                         | 42.7 (d)        |
| 21a  | 1.38 d (6.9)         | 13.1 (q)        | 1.36 d (7.8)                   | 12.6 (q)        |
| 22   | 4.30 d (9.1)         | 73.5 (d)        | 4.26 m                         | 73.0 (d)        |
| 23   | 2.08 m               | 43.2 (t)        | 2.05 m                         | 44.1 (t)        |
|      | 2.15 m               |                 | 2.12 m                         |                 |
| 24   | 4.88 t (10.0)        | 73.5 (d)        | 4.84 m                         | 67.4 (d)        |
| 25   | 1.59 m               | 33.3 (t)        | 1.51 m                         | 32.8 (t)        |

|     |               |           |                           |           |
|-----|---------------|-----------|---------------------------|-----------|
|     | 1.68 m        |           | 1.66 m                    |           |
| 26  | 1.55 m        | 28.1 (t)  | 1.53 m                    | 27.6 (t)  |
|     | 1.98 m        |           | 1.97 m                    |           |
| 27  | 2.93 m        | 36.5 (d)  | 2.71 m                    | 36.1 (d)  |
| 27a | 1.20 d (7.4)  | 16.8 (q)  | 1.17 d (6.7)              | 16.3 (q)  |
| 28  |               | 101.1 (s) |                           | 100.6 (s) |
| 29  |               | 202.1 (s) |                           | 201.6 (s) |
| 30  |               | 169.3 (s) |                           | 168.8 (s) |
| 31  | 3.25 d (13.4) | 44.5 (t)  | 3.20 d (13.3)             | 43.9 (t)  |
|     | 3.45 t (13.2) |           | 3.40ddd (2.9, 12.9, 13.3) |           |
| 32  | 1.05 m        | 25.6 (t)  | 1.00 m                    | 25.1 (t)  |
|     | 1.25 m        |           | 1.30 m                    |           |
| 33  | 1.51 m        | 21.8 (t)  | 1.48 m                    | 21.3 (t)  |
| 34  | 2.10 m        | 27.8(t)   | 2.07 m                    | 27.4 (t)  |
|     | 2.15 m        |           | 2.16 m                    |           |
| 35  | 5.52 br s     | 52.1 (d)  | 5.49 dd (4.6, 6.2)        | 81.6 (d)  |
| 36  |               | 170.5 (s) |                           | 170.0 (s) |

<sup>a</sup> Recorded at 600 MHz for <sup>1</sup>H and 150 MHz for <sup>13</sup>C NMR in Pyridine-*d*<sub>5</sub>

<sup>b</sup> Recorded at 400 MHz for <sup>1</sup>H and 100 MHz for <sup>13</sup>C NMR in Pyridine-*d*<sub>5</sub>

**Table S2:** NMR data for **2** (in CD<sub>3</sub>OD).

| Pos. | <sup>1</sup> H ( <i>J</i> in Hz) | □ <sup>13</sup> C | HMBC                              |
|------|----------------------------------|-------------------|-----------------------------------|
| 1    | 1.15 d (6.1)                     | 21.1 (q)          | C-2, C-3                          |
| 2    | 3.52 d (6.5)                     | 72.9 (d)          | C-4, C-5a                         |
| 3    | 2.41 m                           | 41.0 (d)          | C-1, C-2, C-4, C-5a               |
| 3a   | 0.99 d (6.4)                     | 17.4 (q)          | C-2, C-3, C-4                     |
| 4    | 5.24 d (10.5)                    | 131.0 (d)         | C-2, C-3, C-3a, C-5a, C-6         |
| 5    |                                  | 137.9 (s)         |                                   |
| 5a   | 1.651 s                          | 11.9 (q)          | C-4, C-5, C-6                     |
| 6    | 3.99 t (6.9)                     | 79.0 (d)          | C-4, C-5, C-5a, C-7, C-8          |
| 7    | 2.31 m<br>2.36 m                 | 34.0 (t)          | C-5, C-6, C-8, C-9                |
| 8    | 5.27 d (6.6)                     | 123.9 (d)         | C-7, C-9, C-9a, C-10              |
| 9    |                                  | 145.0 (s)         |                                   |
| 9a   | 2.07 m                           | 21.8 (t)          | C-8, C-9, C-9b, C-10              |
| 9b   | 1.06 t (7.1)                     | 14.8 (q)          | C-9, C-9a                         |
| 10   | 3.68 d (6.4)                     | 82.3 (d)          | C-8, C-9, C-9a, C-11, C-11a, C-12 |
| 11   | 2.12 m                           | 35.2 (d)          |                                   |
| 11a  | 0.88 d (6.5)                     | 15.4 (q)          | C-10, C-11, C-12                  |
| 12   | 1.25 m<br>1.48 m                 | 43.3 (t)          | C-10, C-11, C-11a, C-13, C-14     |
| 13   | 2.54 m                           | 30.8 (d)          |                                   |
| 13a  | 0.92 d (6.2)                     | 22.4 (q)          | C-13, C-14                        |
| 14   | 5.12 d (10.1)                    | 132.3 (d)         | C-12, C-13, C-13a, C-15a, C-16    |
| 15   |                                  | 137.9 (s)         |                                   |
| 15a  | 1.650 s                          | 12.6 (q)          | C-14, C-15, C-16                  |
| 16   | 4.16 m                           | 74.5 (d)          | C-14, C-15, C-15a, C-17, C-18     |
| 17   | 1.55 m<br>1.65 m                 | 44.0 (t)          | C-18                              |
| 18   | 3.91 br s                        | 68.6 (d)          |                                   |
| 19   | 1.62 m<br>1.66 m                 | 44.3 (t)          |                                   |
| 20   | 4.18 m                           | 71.7 (d)          |                                   |
| 21   | 2.15 m                           | 36.2 (d)          |                                   |
| 21a  | 0.89 m                           | 11.2 (q)          | C-20, C-22                        |
| 22   | 3.82 t (8.6)                     | 71.3 (d)          | C-20, C-21a, C-24                 |
| 23   | 1.80 m                           | 42.5 (t)          |                                   |
| 24   | 4.13 m                           | 68.0 (d)          | C-22, C-23, C-26                  |
| 25   | 1.42 m<br>1.61 m                 | 33.1 (t)          |                                   |
| 26   | 1.62 m<br>1.70 m                 | 28.3 (t)          | C-27                              |

|     |               |           |                  |
|-----|---------------|-----------|------------------|
| 27  | 1.61m         | 36.4 (d)  |                  |
| 27a | 0.85 t (7.4)  | 16.2 (q)  | C-26, C-27, C-28 |
| 28  |               | 100.9 (s) |                  |
| 29  |               | 200.3 (s) |                  |
| 30  |               | 168.8 (s) |                  |
| 31  | 4.26 m        | 40.1 (t)  |                  |
|     | 4.37 d (12.0) |           |                  |
| 32  | 1.48 m        | 26.1 (t)  |                  |
|     | 1.69 m        |           |                  |
| 33  | 1.44 m        | 25.7 (t)  |                  |
|     | 1.77 m        |           |                  |
| 34  | 1.70 m        | 27.7 (t)  |                  |
|     | 2.29 m        |           |                  |
| 35  | 3.58 d (13.4) | 46.1 (d)  |                  |
| 36  |               | 169.3 (s) |                  |

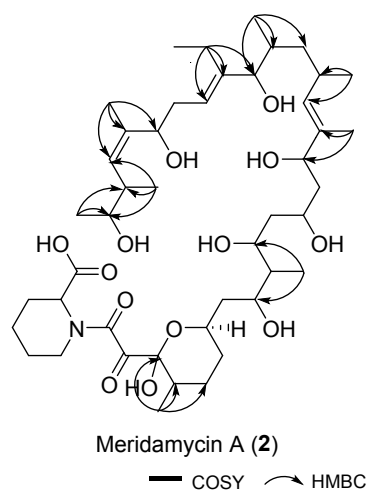

**Figure S1:** Selected  $^1\text{H}$ - $^1\text{H}$  COSY and HMBC correlations for **2**.

**Table S3:** NMR data for **3** (in CD<sub>3</sub>OD).

| Pos. | $\delta^1\text{H}$ J= Hz  | $\delta^{13}\text{C}$ | $^1\text{H}$ - $^1\text{H}$ COSY | HMBC                                 |
|------|---------------------------|-----------------------|----------------------------------|--------------------------------------|
| 1    | 1.15 d (6.3)              | 21.1 (q)              | H-2                              | C-2, C-3                             |
| 2    | 3.54 f (6.4, 13.0)        | 72.9 (d)              | H-1, H-3                         | C-3, C-3a, C-4                       |
| 3    | 2.42 m                    | 41.0 (d)              | H-2                              | C-1, C-2, C-3a, C-4, C-5             |
| 3a   | 0.99 d (6.7)              | 17.4 (q)              | H-3                              |                                      |
| 4    | 5.25 d (9.8)              | 130.9 (d)             | H-3, H-6                         | C-2, C-3, C-3a, C-5a, C-6            |
| 5    |                           | 137.9 (s)             |                                  |                                      |
| 5a   | 1.66 s                    | 12.0 (q)              | H-4                              | C-4, C-5, C-6                        |
| 6    | 3.99 t (7.0)              | 79.0 (d)              | H-4, H-7                         | C-4, C-5, C-5a, C-7, C-8             |
| 7    | 2.30 m<br>2.37 m          | 34.1 (t)              | H-6                              | C-5, C-6, C-8, C-9                   |
| 8    | 5.28 t (7.0)              | 123.9 (d)             | H-7, H10                         | C-6, C-7, C-9, C-9a, C-9b,<br>C-10   |
| 9    |                           | 145.0 (s)             |                                  |                                      |
| 9a   | 2.08 m                    | 21.8 (t)              | H-9b                             | C-8, C-9, C-9b, C-10                 |
| 9b   | 1.06 t (7.6)              | 14.8 (q)              | H-9a                             | C-9, C-9a                            |
| 10   | 3.69 d (6.6)              | 82.2 (d)              | H-8, H-11                        | C-8, C-9, C-9a, C-11, C-11a,<br>C-12 |
| 11   | 1.61 m                    | 35.2 (d)              | H-10, H-12                       |                                      |
| 11a  | 0.88 d (6.5)              | 15.4 (q)              | H-11                             | C-10, C-11, C-12                     |
| 12   | 1.10 m<br>1.27 m          | 43.2 (t)              | H-10, H-11, H-13                 | C-11, C-11a, C-13, C-14              |
| 13   | 2.56 m                    | 30.8 (d)              | H-12                             |                                      |
| 13a  | 0.92 d (6.2)              | 22.4 (q)              | H-13                             | C-12, C-13, C-14                     |
| 14   | 5.13 d (10.6)             | 132.3 (d)             | H-13, H-15a, H-16                | C-12, C-13, C-15a, C-16              |
| 15   |                           | 137.9 (s)             |                                  |                                      |
| 15a  | 1.65 s                    | 12.5 (q)              | H-14                             | C-14, C-15, C-16                     |
| 16   | 4.18 m                    | 74.4 (d)              | H-14, H-17                       | C-14, C-18                           |
| 17   | 1.78 m                    | 42.4 (t)              |                                  |                                      |
| 18   | 3.92 m                    | 68.8 (d)              |                                  |                                      |
| 19   | 1.61 m<br>1.64 m          | 44.4 (t)              |                                  |                                      |
| 20   | 4.24 m                    | 71.8 (d)              | H-21                             | C-21a                                |
| 21   | 1.58 m                    | 44.3 (d)              |                                  |                                      |
| 21a  | 0.88 d (6.5)              | 11.0 (q)              | H-21                             |                                      |
| 22   | 3.83 m                    | 71.1 (d)              | H-21                             | C-20                                 |
| 23   | 3.35 m<br>3.58 br d (3.4) | 46.1 (t)              |                                  |                                      |
| 24   | 4.15 m                    | 67.8 (d)              |                                  |                                      |
| 25   | 1.44 m<br>1.62 m          | 33.2 (t)              |                                  |                                      |
| 26   | 1.76 m                    | 28.2 (t)              |                                  |                                      |

|        |              |           |      |                        |
|--------|--------------|-----------|------|------------------------|
| 27     | 2.23 m       | 36.2 (d)  |      |                        |
| 27a    | 0.84 t (6.5) | 15.9 (q)  | H-27 | C-26, C-27, C-28       |
| 28     |              | 100.8 (s) |      |                        |
| 29     |              | 200.1 (s) |      | C-28                   |
| 30     |              | 169.4 (s) |      |                        |
| 31     | 1.49 m       | 42.5 (t)  |      |                        |
| 32     | 1.67 m       | 26.0 (t)  |      |                        |
| 33     | 1.77 m       | 22.3 (t)  |      |                        |
| 34     | 2.26 m       | 27.6 (t)  | H-33 |                        |
| 35     | 5.14 m       | 52.8 (d)  | H-34 | C-30, C-33, C-34, C-36 |
| 36     |              | 171.8 (s) |      |                        |
| 36-OMe | 3.77 m       | 53.0 (q)  |      | C-36                   |

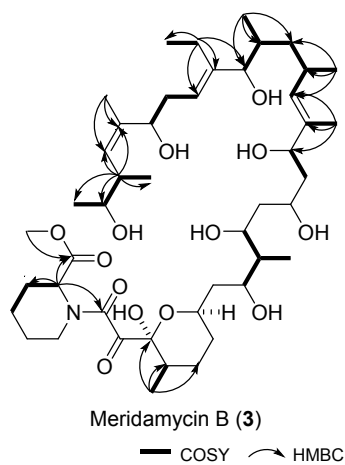

**Figure S2:** Selected  $^1\text{H}$ - $^1\text{H}$  COSY and HMBC correlations for compound **3**.



**Table S4:** NMR data for **4** (in CD<sub>3</sub>OD).

| Pos. | $\delta^1\text{H}$ J= Hz | $\delta^{13}\text{C}$ | $^1\text{H}$ - $^1\text{H}$ COSY | HMBC                        |
|------|--------------------------|-----------------------|----------------------------------|-----------------------------|
| 1    | 1.15 d (6.3)             | 21.2 (q)              | H-2                              | C-2, C-3                    |
| 2    | 3.51 m                   | 72.9 (d)              | H-1, H-3                         | C-3a, C-4                   |
| 3    | 2.43 m                   | 41.0 (d)              | H-2, H-3a, H-4                   | C-5                         |
| 3a   | 0.99 d (6.7)             | 17.4 (q)              | H-3                              | C-2, C-3, C-4               |
| 4    | 5.25 m                   | 130.9 (d)             | H-3, H-5a                        | C-5a, C-6                   |
| 5    |                          | 137.9 (s)             |                                  |                             |
| 5a   | 1.653 s                  | 11.9 (q)              |                                  | C-4, C-5, C-6               |
| 6    | 4.00 t (6.7)             | 79.0 (d)              | H-7                              | C-4, C-5a, C-8              |
| 7    | 2.34 m                   | 34.1 (t)              | H-6, H-8                         | C-6, C-8, C-9               |
| 8    | 5.29 m                   | 123.8 (d)             | H-7                              | C-9a, C-10                  |
| 9    |                          | 145.1 (s)             |                                  |                             |
| 9a   | 2.06 m                   | 21.8 (t)              | H-9b                             | C-9, C-9b, C-10             |
| 9b   | 1.06 t (7.5)             | 14.8 (q)              | H-9a                             | C-9, C-9a                   |
| 10   | 3.69 m                   | 82.3 (d)              | H-11                             | C-8, C-9, C-9a, C-11, C-11a |
| 11   | 1.59 m                   | 35.3 (d)              |                                  |                             |
| 11a  | 0.89 m                   | 15.4 (q)              | H-11                             | C-10, C-11, C-12            |
| 12   | 1.09 m                   | 43.3 (t)              |                                  |                             |
|      | 1.25 m                   |                       |                                  |                             |
| 13   | 2.56 m                   | 30.8 (d)              | H-13a                            |                             |
| 13a  | 0.93 m                   | 22.4 (q)              | H-13                             | C-12, C-13, C-14            |
| 14   | 5.13 d (7.5)             | 132.3 (d)             | H-13, H-15a                      | C-15a, C-16                 |
| 15   |                          | 137.9 (s)             |                                  |                             |
| 15a  | 1.650 s                  | 12.6 (q)              |                                  | C-14, C-15, C-16            |
| 16   | 4.18 m                   | 74.4 (d)              | H-15a, H-17                      |                             |
| 17   | 1.64 m                   | 44.3 (t)              |                                  |                             |
| 18   | 3.83 m                   | 69.1 (d)              |                                  |                             |
| 19   | 1.57 m                   | 42.7 (t)              |                                  |                             |
| 20   | 4.17 m                   | 71.3 (d)              | H-19                             |                             |
| 21   | 1.55 m                   | 44.3 (d)              |                                  |                             |
| 21a  | 0.91 m                   | 10.8 (q)              |                                  | C-20                        |
| 22   | 3.86 m                   | 71.8 (d)              | H-21                             |                             |
| 23   | 1.69 m                   | 42.5 (t)              |                                  | C-24                        |
|      | 1.85 m                   |                       |                                  |                             |
| 24   | 3.93 m                   | 68.7 (d)              | H-23                             |                             |
| 25   | 1.48 m                   | 36.8 (t)              |                                  |                             |
| 26   | 1.81 m                   | 31.3 (t)              | H-25                             |                             |
| 27   | 2.51 m                   | 37.2 (d)              | H-27a                            |                             |
| 27a  | 1.27 m                   | 17.7 (q)              | H-27                             | C-26, C-28                  |
| 28   |                          | 180.8 (s)             |                                  |                             |

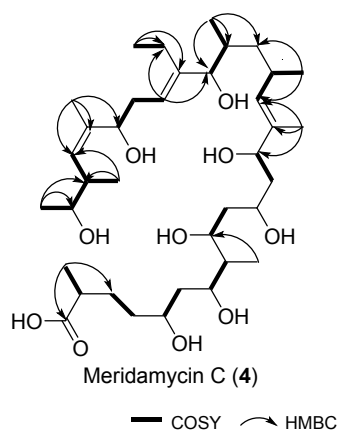

**Figure S3:** Selected  $^1\text{H}$ - $^1\text{H}$  COSY and HMBC correlations for compound **4**.

**Table S5:** NMR data for **5** (in CD<sub>3</sub>OD).

| Pos.   | <sup>1</sup> H ( <i>J</i> in Hz) | <sup>13</sup> C | <sup>1</sup> H- <sup>1</sup> H COSY | HMBC                                 |
|--------|----------------------------------|-----------------|-------------------------------------|--------------------------------------|
| 1      | 1.15 d (6.4)                     | 21.2 (q)        | H-2                                 | C-2, C-3                             |
| 2      | 3.53 f (6.4, 13.0)               | 72.9 (d)        | H-1, H-3                            | C-3a, C-4                            |
| 3      | 2.43 m                           | 41.0 (d)        | H-2, H-3a, H-4                      | C-2, C-4                             |
| 3a     | 0.99 d (6.7)                     | 17.4 (q)        | H-3                                 | C-2, C-3, C-4                        |
| 4      | 5.25 d (9.8)                     | 130.9 (d)       | H-3, H-5a, H-6                      | C-3a, C-5a, C-6                      |
| 5      |                                  | 137.9 (s)       |                                     |                                      |
| 5a     | 1.653 s                          | 12.0 (q)        | H-4                                 | C-4, C-5, C-6                        |
| 6      | 3.99 t (7.1)                     | 79.0 (d)        | H-4, H-7                            | C-4, C-5, C-5a, C-7, C-8             |
| 7      | 2.31 m<br>2.36 m                 | 34.1 (t)        | H-6, H-8                            | C-5, C-6, C-8, C-9                   |
| 8      | 5.28 t (7.0)                     | 123.8 (d)       | H-7, H10                            | C-6, C-9a, C-10                      |
| 9      |                                  | 145.0 (s)       |                                     |                                      |
| 9a     | 2.10 m                           | 21.9 (t)        | H-9b                                | C-8, C-9, C-9b, C-10                 |
| 9b     | 1.06 t (7.6)                     | 14.8 (q)        | H-9a                                | C-9, C-9a                            |
| 10     | 3.68 d (6.0)                     | 82.3 (d)        | H-8, H-11                           | C-8, C-9, C-9a, C-11, C-11a,<br>C-12 |
| 11     | 1.61 m                           | 35.3 (d)        | H-10, H-11a                         | C-12                                 |
| 11a    | 0.88 d (6.5)                     | 15.4 (q)        | H-11                                | C-10, C-11, C-12                     |
| 12     | 1.09 m<br>1.27 m                 | 43.3 (t)        | H-11, H-13                          | C-14                                 |
| 13     | 2.56 (m)                         | 30.8 (d)        | H-13a, H-14                         |                                      |
| 13a    | 0.92 d (6.8)                     | 22.4 (q)        | H-13                                | C-12, C-13, C-14                     |
| 14     | 5.13 d (9.7)                     | 132.3 (d)       | H-13, H-15a                         | C-13a, C-15a, C-16                   |
| 15     |                                  | 137.9 (s)       |                                     |                                      |
| 15a    | 1.651 s                          | 12.6 (q)        | H-14, H-16                          | C-14, C-15, C-16                     |
| 16     | 4.18 m                           | 74.4 (d)        | H-14, H-15a, H-17                   | C-14                                 |
| 17     | 1.53 m                           | 44.3 (t)        | H-18                                |                                      |
| 18     | 3.82 m                           | 69.1 (d)        | H-19                                |                                      |
| 19     | 1.47 m                           | 42.6 (t)        |                                     | C-18                                 |
| 20     | 4.17 m                           | 71.5 (d)        | H-21                                |                                      |
| 21     | 1.69 m                           | 44.2 (d)        |                                     |                                      |
| 21a    | 0.91 d (7.1)                     | 10.8 (q)        | H-21                                | C-20                                 |
| 22     | 3.85 m                           | 71.9 (d)        | H-23                                |                                      |
| 23     | 1.55 m                           | 43.1 (t)        |                                     |                                      |
| 24     | 3.94 m                           | 68.4 (d)        |                                     |                                      |
| 25     | 1.43 m                           | 36.7 (t)        | H-27                                |                                      |
| 26     | 1.78 m                           | 31.2 (t)        | H-25, H-27                          | C-25, C-27, C-27a                    |
| 27     | 2.51 m                           | 40.6 (d)        | H-6, H-27a                          | C-25, C-26, C-28                     |
| 27a    | 1.16 d (7.1)                     | 17.6 (q)        | H-27                                | C-26, C-27, C-28                     |
| 28     |                                  | 178.9 (s)       |                                     |                                      |
| 28-OMe | 3.66 br s                        | 52.1 (q)        |                                     | C-28                                 |

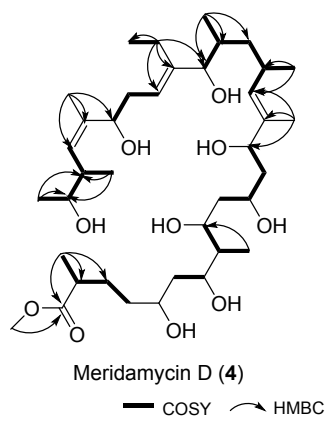

**Figure S4:** Selected  $^1\text{H}$ - $^1\text{H}$  COSY and HMBC correlations for compound **5**.

**NMR spectrum for compounds 1- 5.**

|                   |                                                                                             |   |
|-------------------|---------------------------------------------------------------------------------------------|---|
| <b>Figure M1</b>  | $^1\text{H}$ NMR (600 MHz, d5-pyridine) spectrum for compound <b>1</b> .....                | 4 |
| <b>Figure M2</b>  | $^{13}\text{C}$ NMR (151 MHz, d5-pyridine) spectrum for compound <b>1</b> .....             | 4 |
| <b>Figure M3</b>  | The HSQC spectrum for compound <b>1</b> .....                                               | 5 |
| <b>Figure M4</b>  | The HMBC spectrum for compound <b>1</b> .....                                               | 5 |
| <b>Figure M5</b>  | $^1\text{H}/^1\text{H}$ COSY spectrum for compound <b>1</b> .....                           | 6 |
| <b>Figure M6</b>  | The HRMS-ESI spectrum for compound <b>1</b> .....                                           | 6 |
| <b>Figure MA1</b> | $^1\text{H}$ NMR (600 MHz, $\text{CD}_3\text{OD}$ ) spectrum for compound <b>2</b> .....    | 7 |
| <b>Figure MA2</b> | $^{13}\text{C}$ NMR (151 MHz, $\text{CD}_3\text{OD}$ ) spectrum for compound <b>2</b> ..... | 7 |
| <b>Figure MA3</b> | The HSQC spectrum for compound <b>2</b> .....                                               | 8 |
| <b>Figure MA4</b> | The HMBC spectrum for compound <b>2</b> .....                                               | 8 |

|                   |                                                                                        |    |
|-------------------|----------------------------------------------------------------------------------------|----|
| <b>Figure MA5</b> | The HRMS-ESI spectrum for compound <b>2</b> .....                                      | 9  |
| <b>Figure MB1</b> | <sup>1</sup> H NMR (600 MHz, CD <sub>3</sub> OD) spectrum for compound <b>3</b> .....  | 9  |
| <b>Figure MB2</b> | <sup>13</sup> C NMR (151 MHz, CD <sub>3</sub> OD) spectrum for compound <b>3</b> ..... | 10 |
| <b>Figure MB3</b> | The HSQC spectrum for compound <b>3</b> .....                                          | 10 |
| <b>Figure MB4</b> | The HMBC spectrum for compound <b>3</b> .....                                          | 11 |
| <b>Figure MB5</b> | <sup>1</sup> H/ <sup>1</sup> H COSY spectrum for compound <b>3</b> .....               | 11 |
| <b>Figure MB6</b> | The HRMS-ESI spectrum for compound <b>3</b> .....                                      | 12 |
| <b>Figure MC1</b> | <sup>1</sup> H NMR (400 MHz, CD <sub>3</sub> OD) spectrum for compound <b>4</b> .....  | 12 |
| <b>Figure MC2</b> | <sup>13</sup> C NMR (100 MHz, CD <sub>3</sub> OD) spectrum for compound <b>4</b> ..... | 13 |
| <b>Figure MC3</b> | The HSQC spectrum for compound <b>4</b> .....                                          | 13 |
| <b>Figure MC4</b> | The HMBC spectrum for compound <b>4</b> .....                                          | 14 |
| <b>Figure MC5</b> | <sup>1</sup> H/ <sup>1</sup> H COSY spectrum for compound <b>4</b> .....               | 14 |
| <b>Figure MC6</b> | The HRMS-ESI spectrum for compound <b>4</b> .....                                      | 15 |
| <b>Figure MD1</b> | <sup>1</sup> H NMR (600 MHz, CD <sub>3</sub> OD) spectrum for compound <b>4</b> .....  |    |

5.....15

**Figure MD2**  $^{13}\text{C}$  NMR (151 MHz,  $\text{CD}_3\text{OD}$ ) spectrum for compound

5.....16

**Figure MD3** The HSQC spectrum for compound

5.....16

**Figure MD4** The HMBC spectrum for compound **5**.....17

**Figure MD5**  $^1\text{H}/^1\text{H}$  COSY spectrum for compound

5.....17

**Figure MD6** The HRMS-ESI spectrum for compound **5**.....18

**Figure M1.**  $^1\text{H}$  NMR (600 MHz,  $\text{d}_5\text{-pyridine}$ ) spectrum for compound **1**.

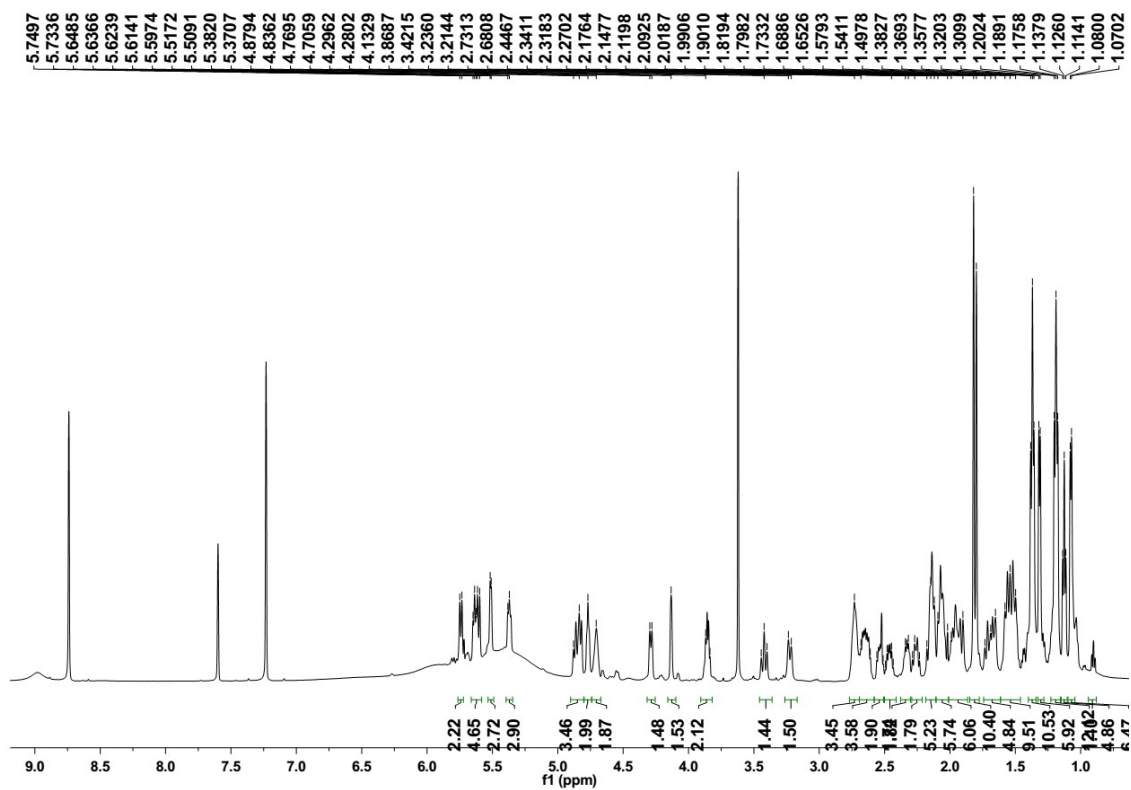

Figure M2.  $^{13}\text{C}$  NMR (151 MHz,  $\text{CDCl}_3$ ) spectrum for compound 1.

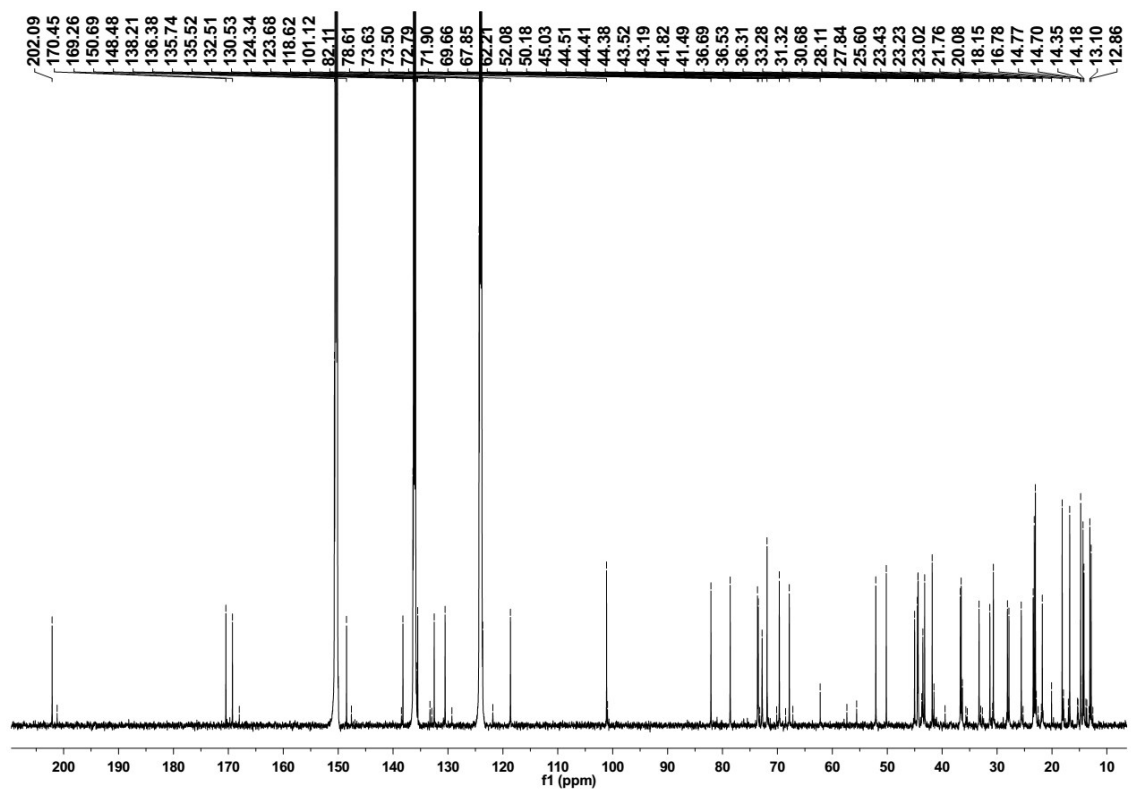

Figure M3. The HSQC spectrum for compound 1.



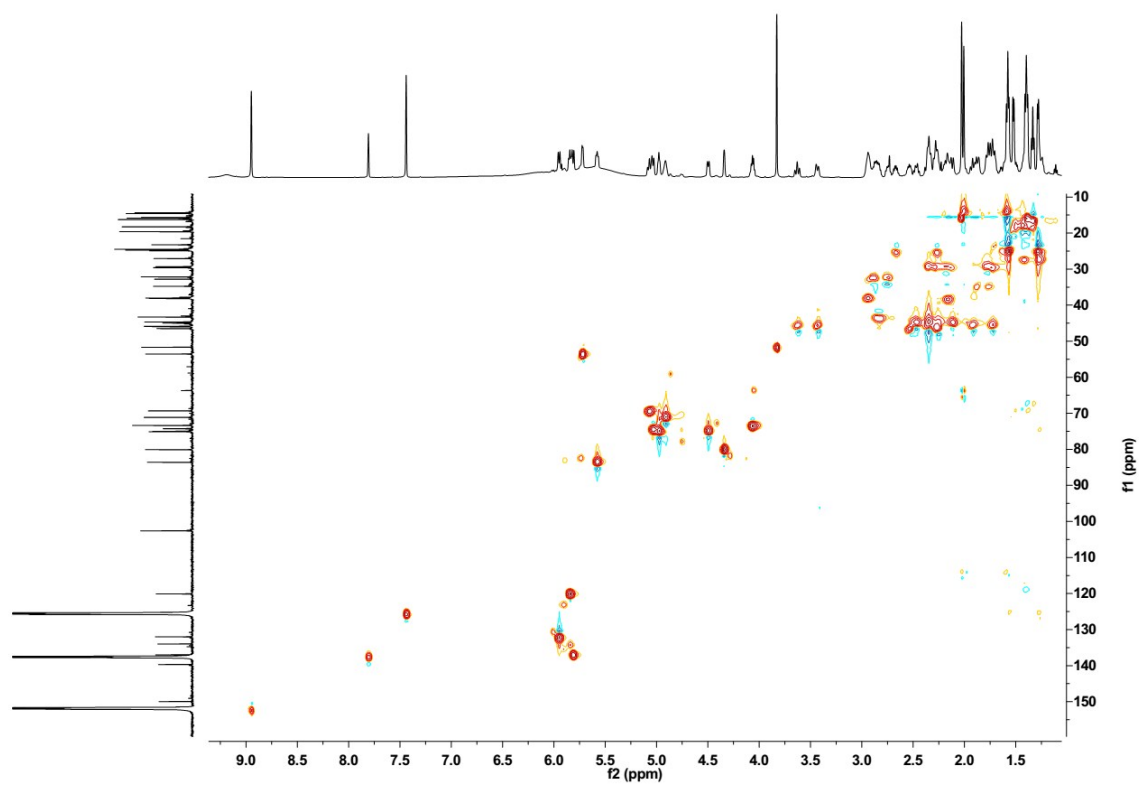

**Figure M4.** The HMBC spectrum for compound **1**.

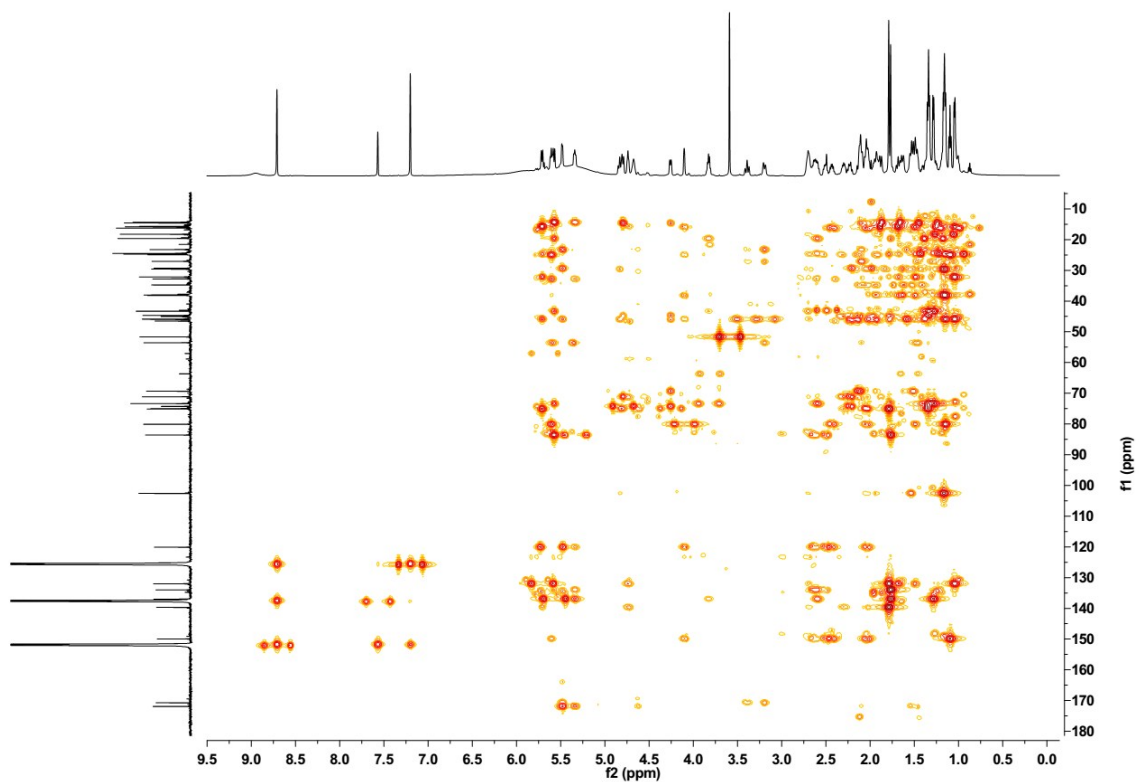

**Figure M5.**  $^1\text{H}/^1\text{H}$  COSY spectrum for compound **1**.

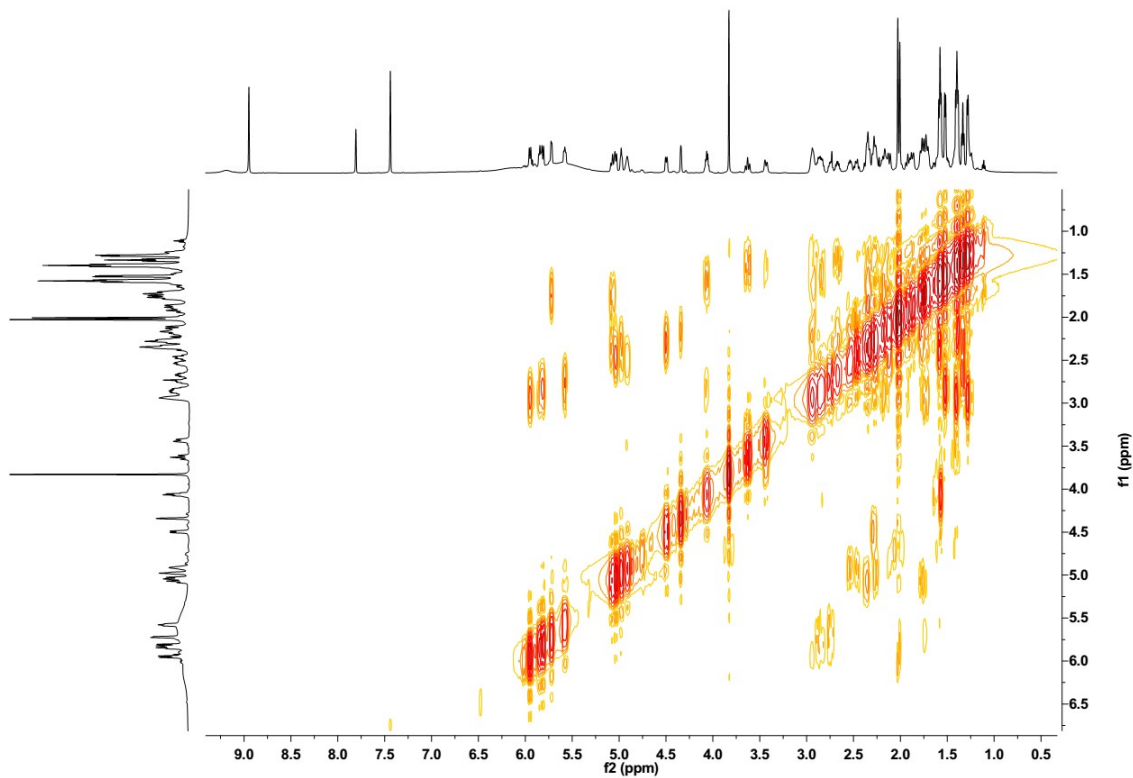

**Figure M6.** The HRMS-ESI spectrum for compound **1**.

5-L0 #6-14 RT: 0.17-0.39 AV: 9 NL: 9.22E6  
 T: FTMS + c ESI Full ms [300.00-1000.00]

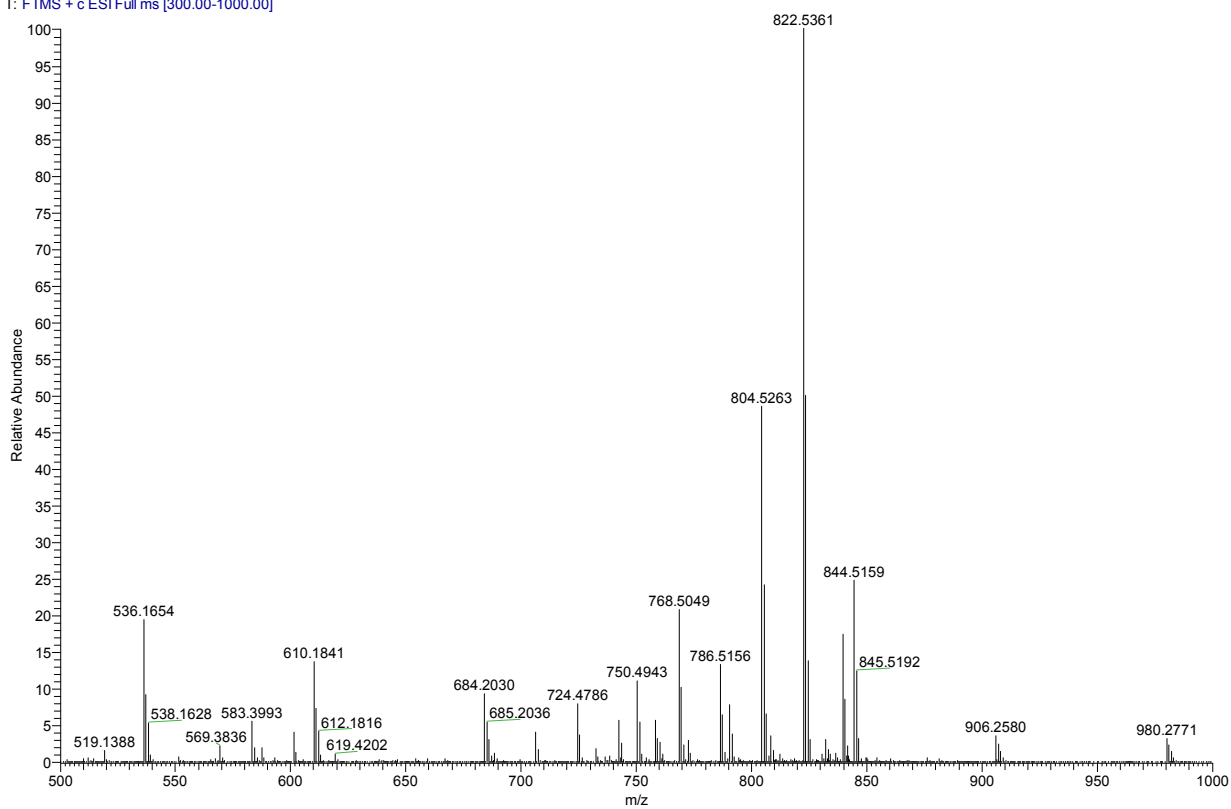

Figure MA1. <sup>1</sup>H NMR (600 MHz, CD<sub>3</sub>OD) spectrum for compound 2.

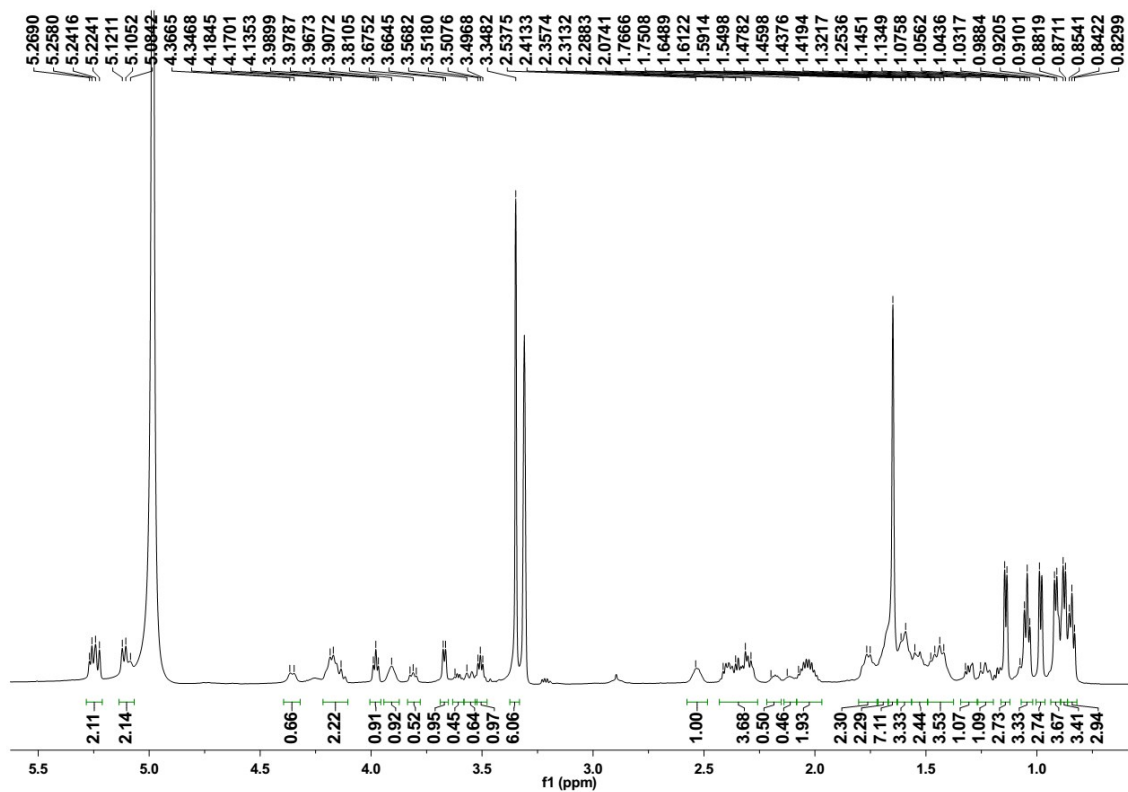

Figure MA2. <sup>13</sup>C NMR (151 MHz, CD<sub>3</sub>OD) spectrum for compound 2.

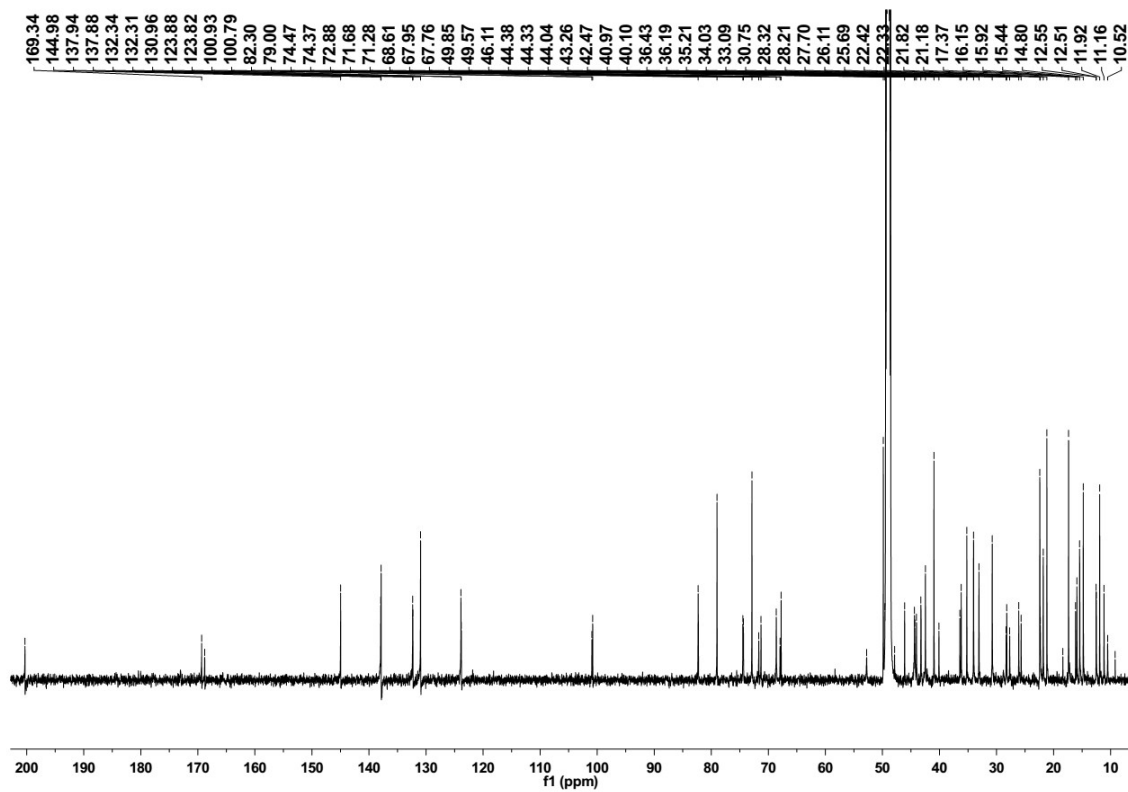

**Figure MA3.** The HSQC spectrum for compound **2**.

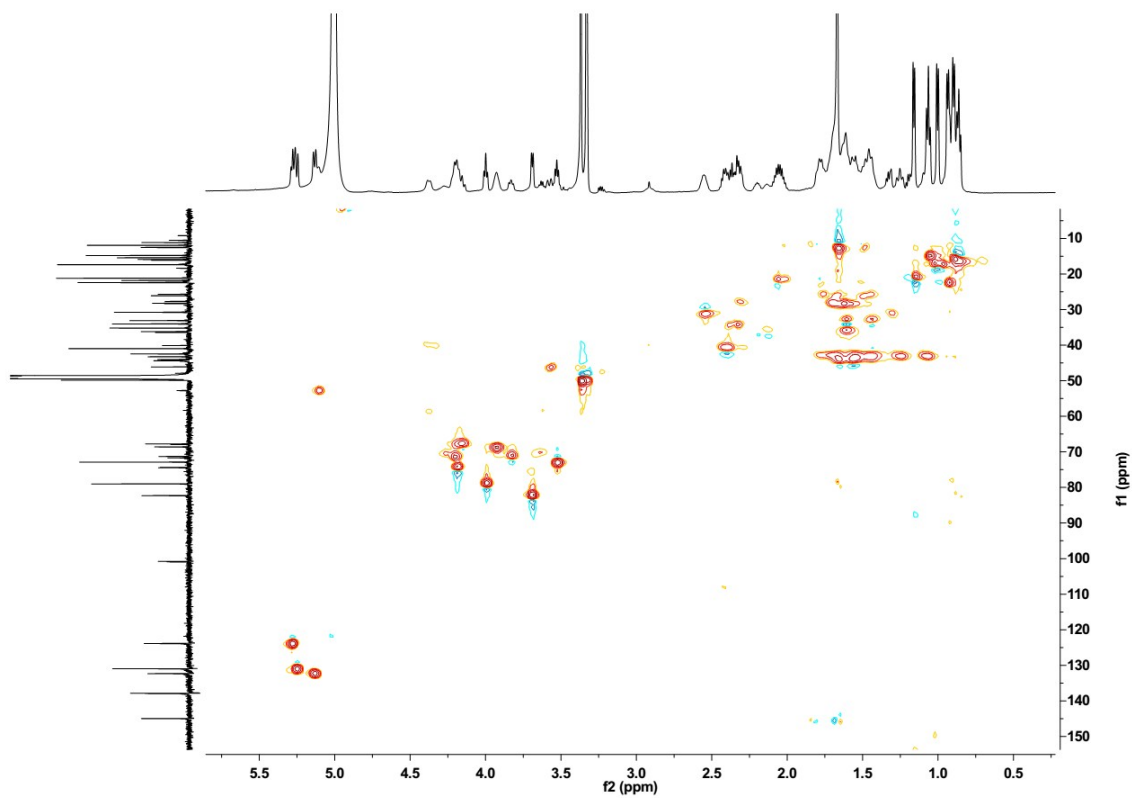

**Figure MA4.** The HMBC spectrum for compound **2**.

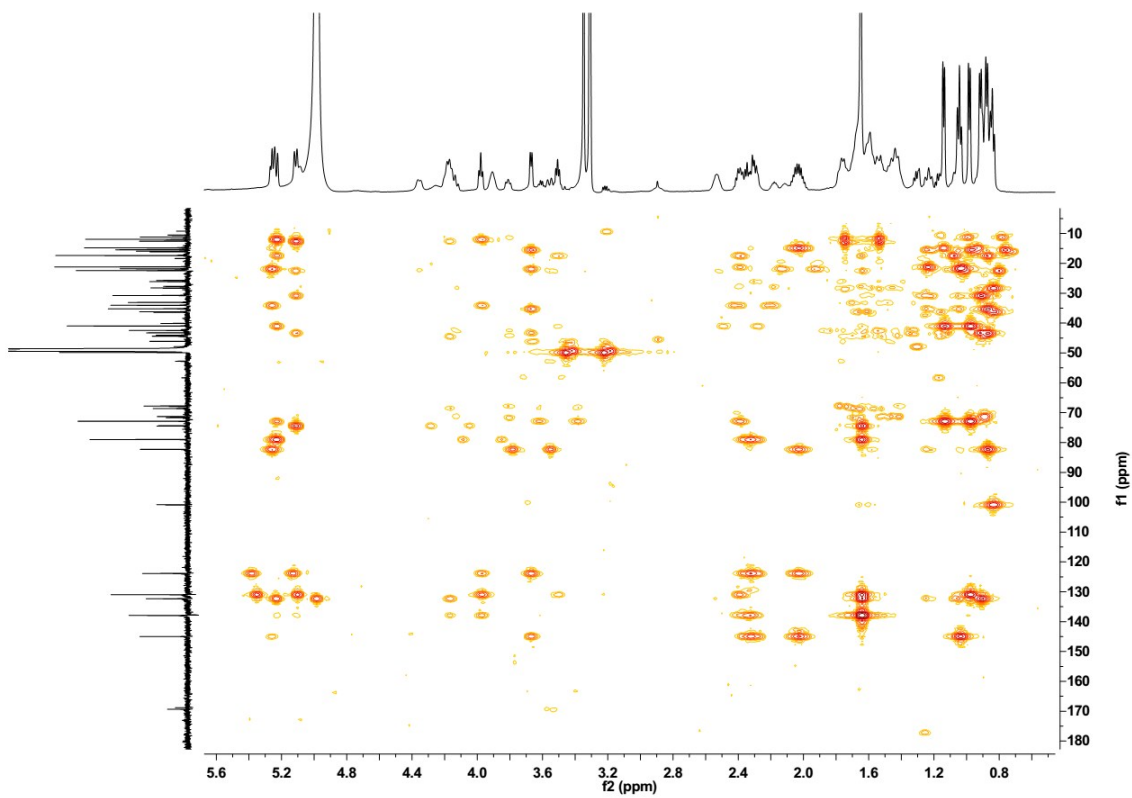

**Figure MA5.** The HRMS-ESI spectrum for compound **2**.

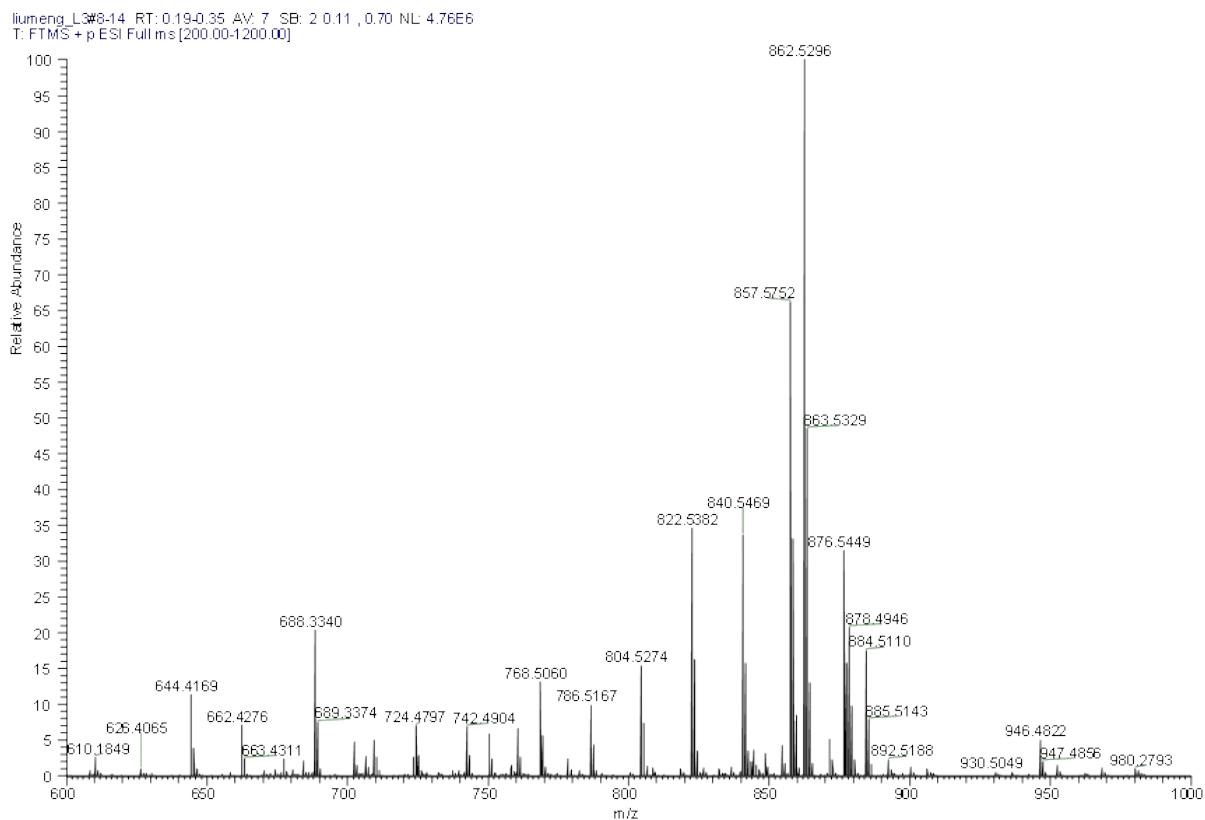

**Figure MB1.**  $^1\text{H}$  NMR (600 MHz,  $\text{CD}_3\text{OD}$ ) spectrum for compound **3**.

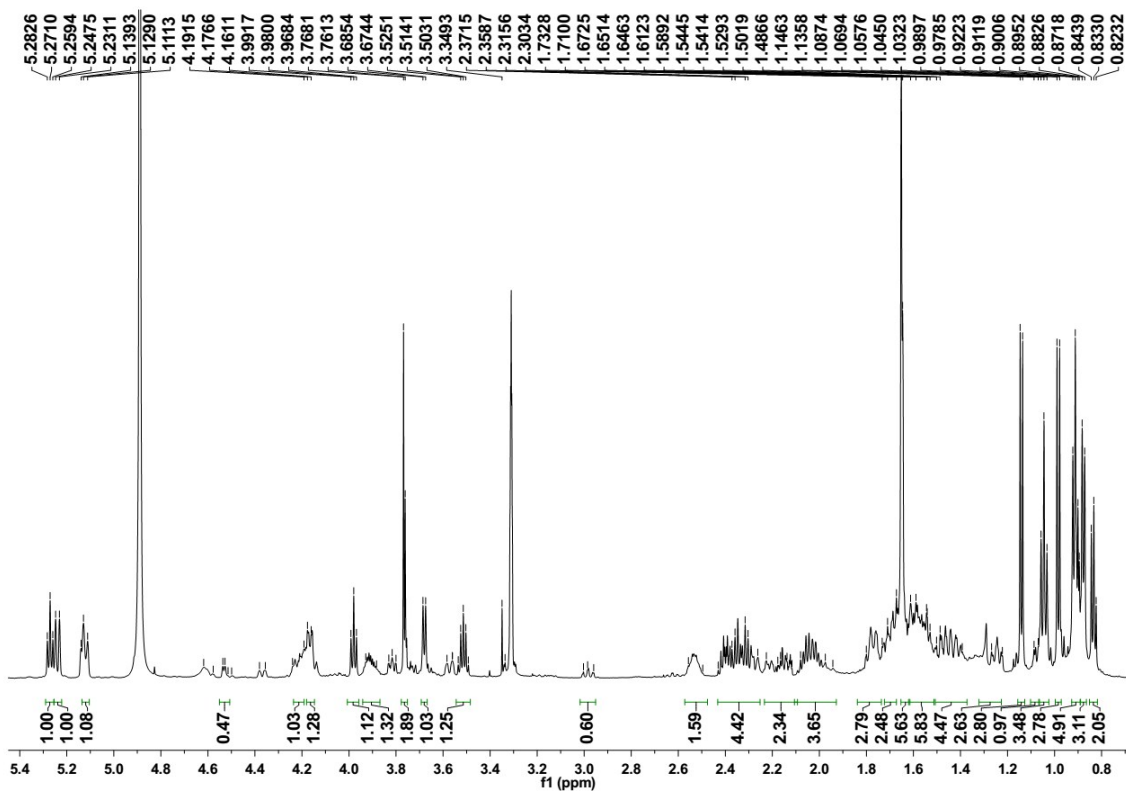

Figure MB2.  $^{13}\text{C}$  NMR (151 MHz,  $\text{CD}_3\text{OD}$ ) spectrum for compound 3.

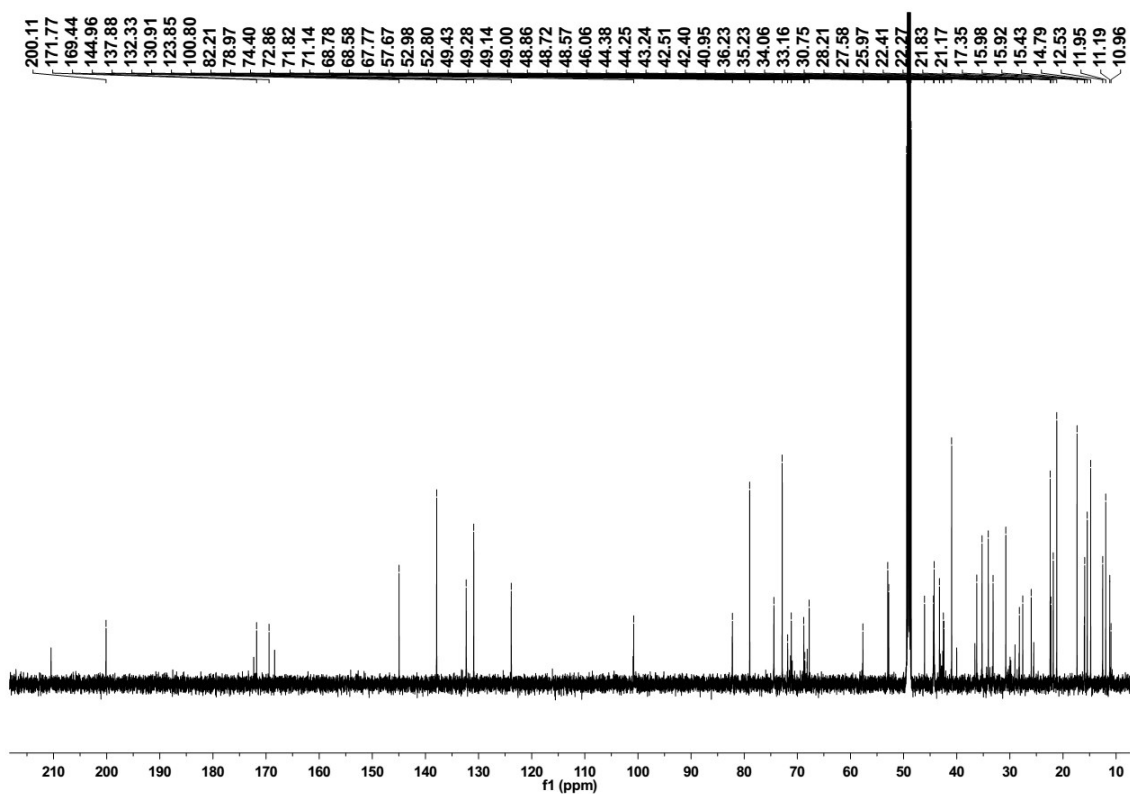

Figure MB3. The HSQC spectrum for compound 3.

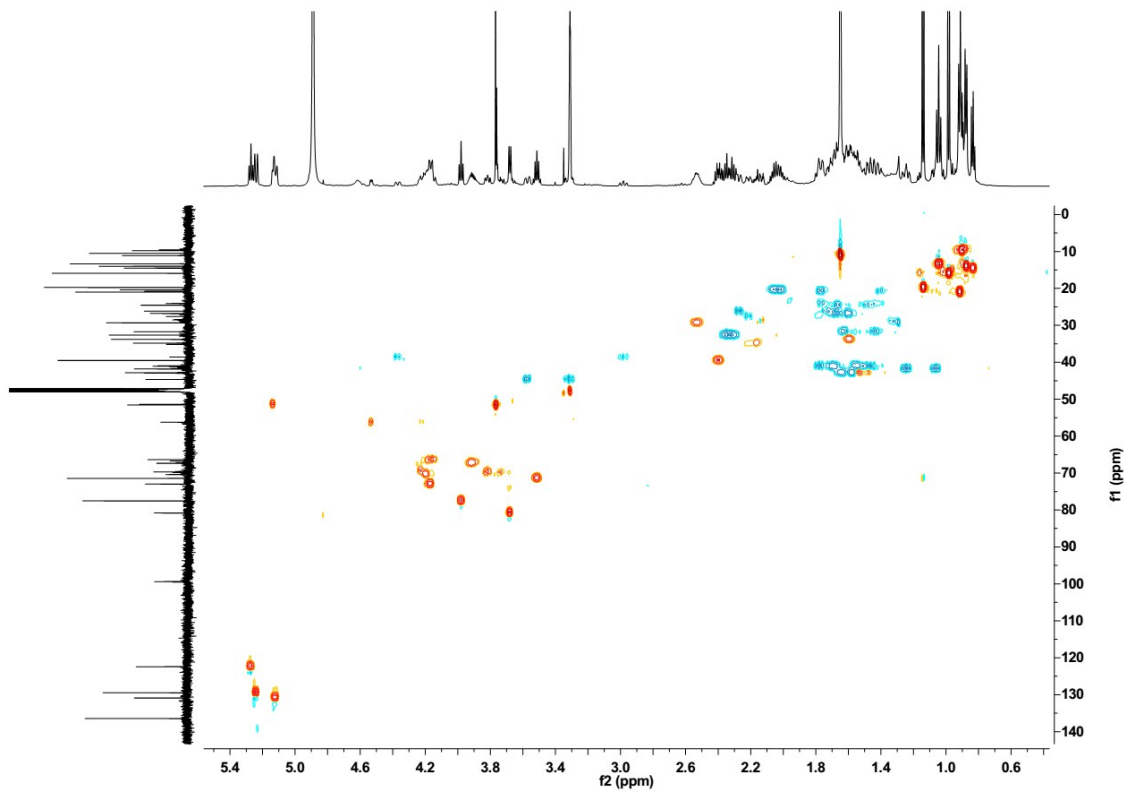

Figure MB4. The HMBC spectrum for compound 3.

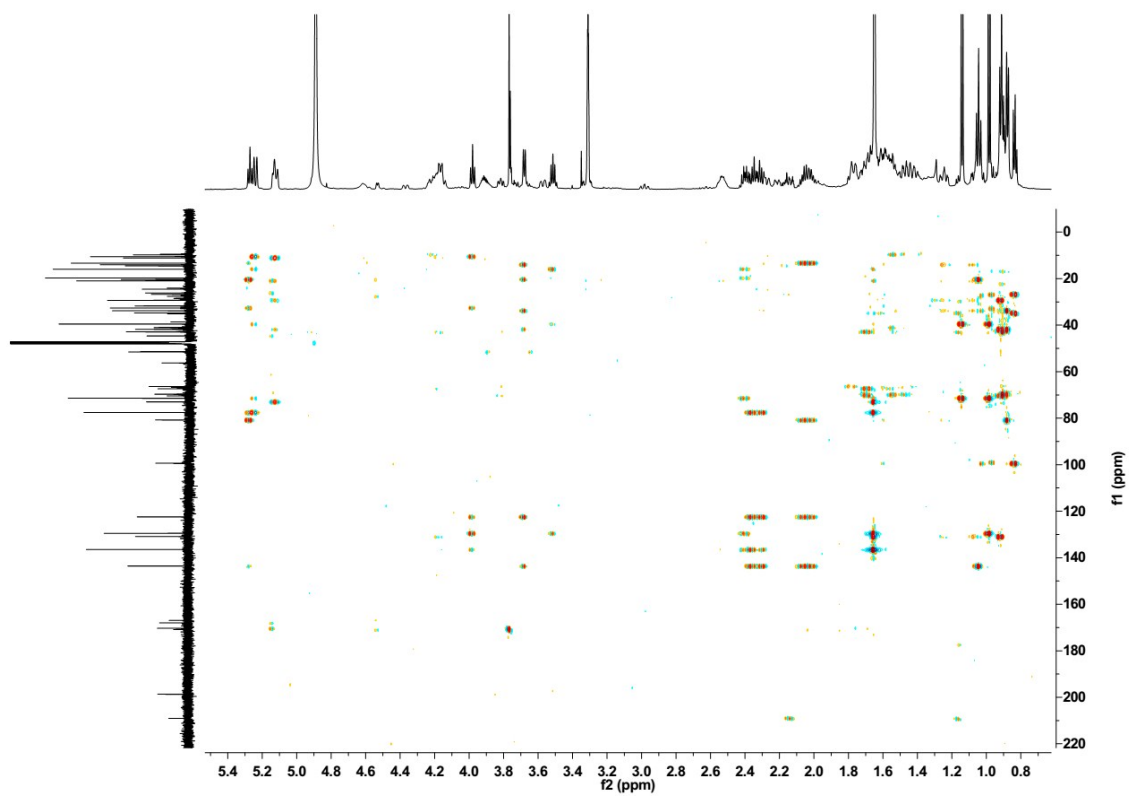

Figure MB5.  $^1\text{H}/^1\text{H}$  COSY spectrum for compound 3.

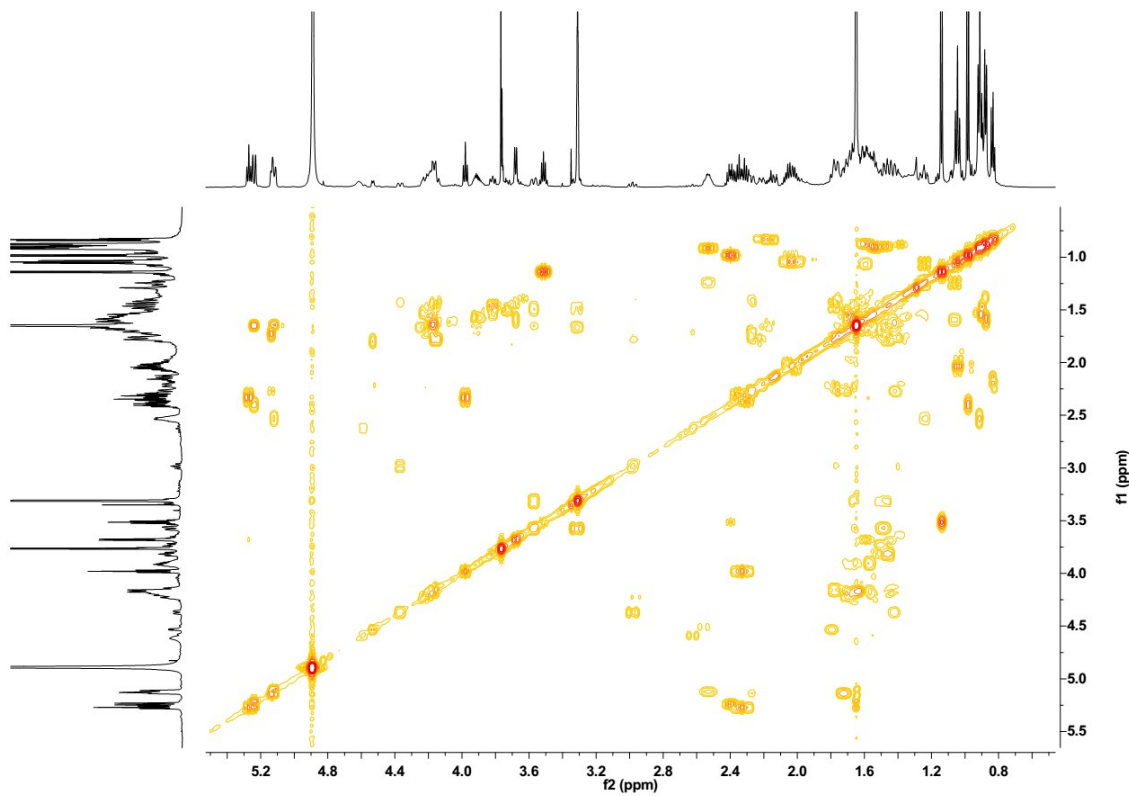

Figure MB6. The HRMS-ESI spectrum for compound 3.

liumeng\_L4 #8-13 RT: 0.19-0.32 AV: 6 SB: 2 0.08, 0.73 NL: 1.06E7  
T: FTMS + p ESI Full ms [200.00-1200.00]

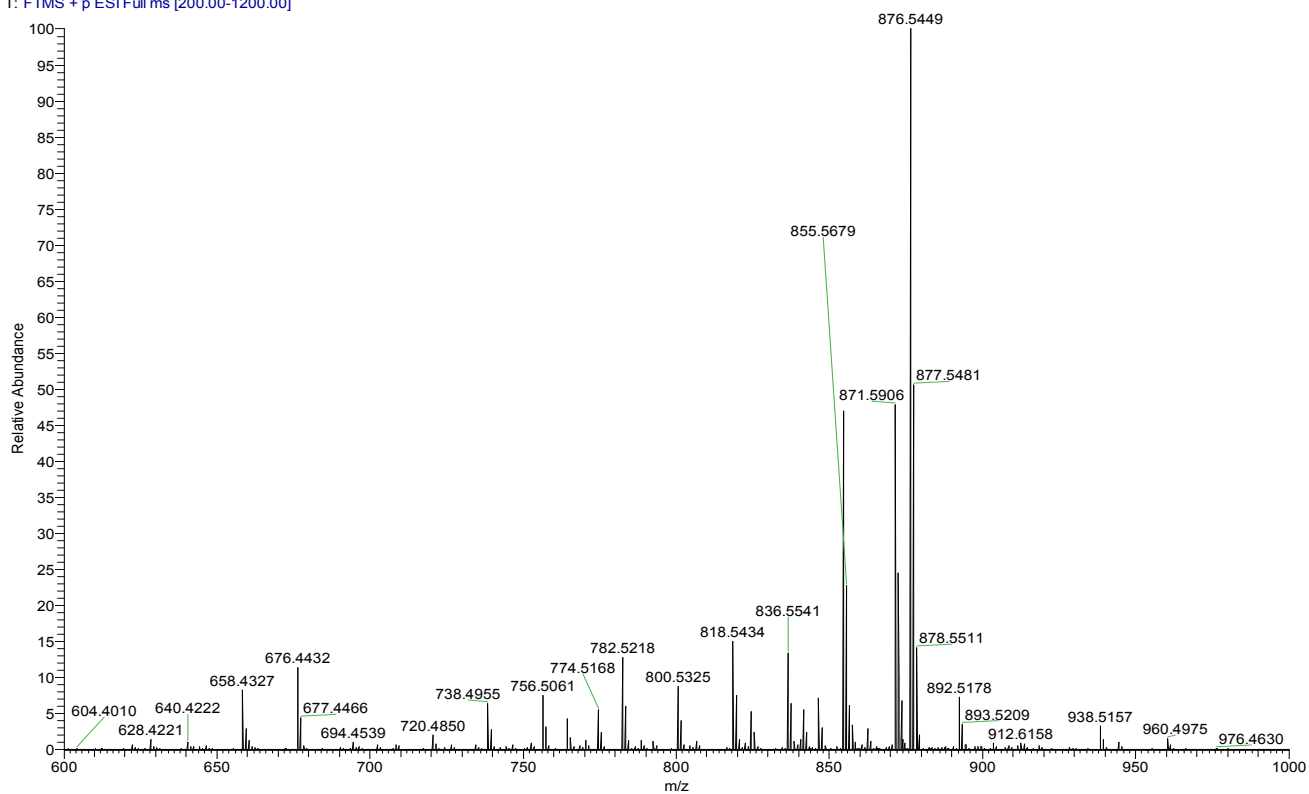

Figure MC1. <sup>1</sup>H NMR (400 MHz, CD<sub>3</sub>OD) spectrum for compound 4.

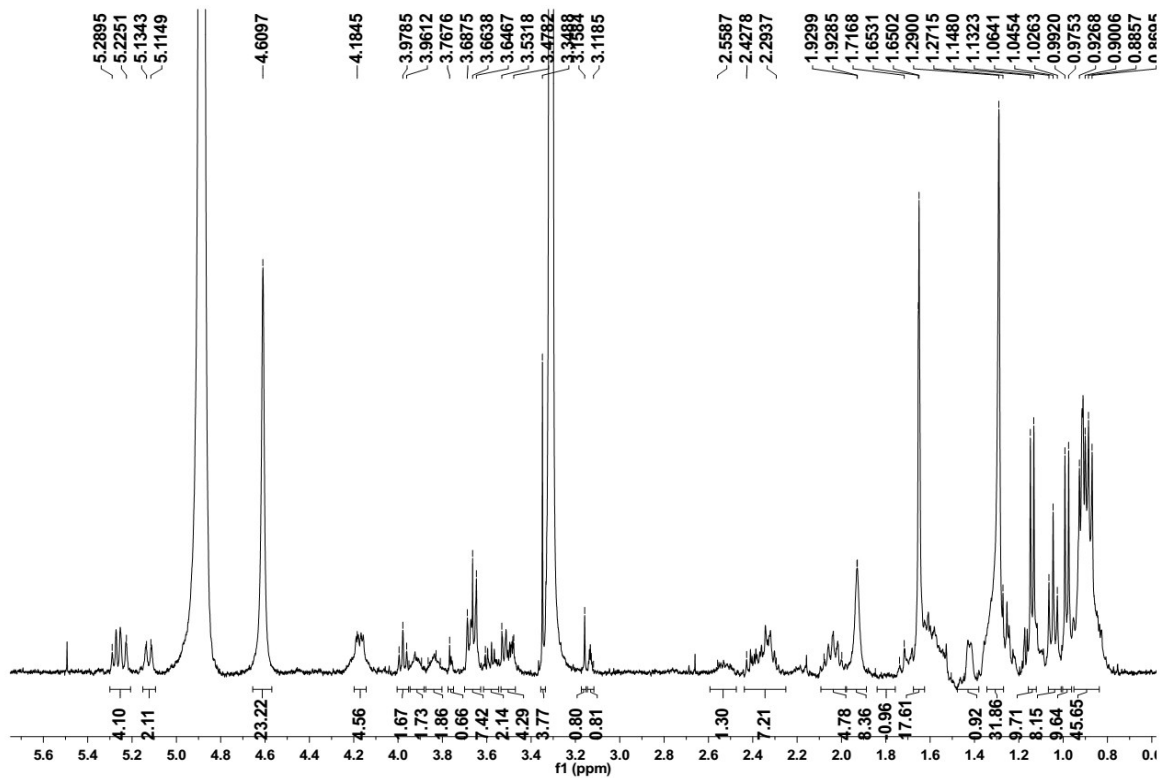



Figure MC2.  $^{13}\text{C}$  NMR (100 MHz,  $\text{CD}_3\text{OD}$ ) spectrum for compound 4.

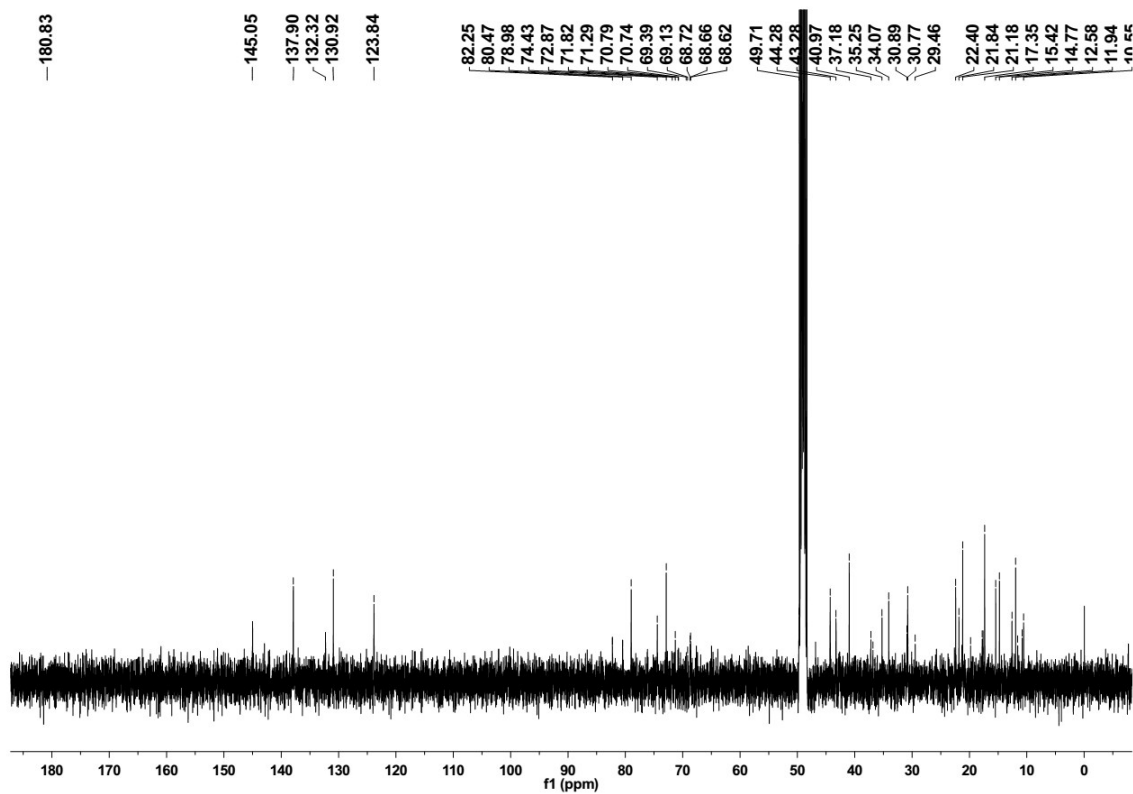

Figure MC3. The HSQC spectrum for compound 4.

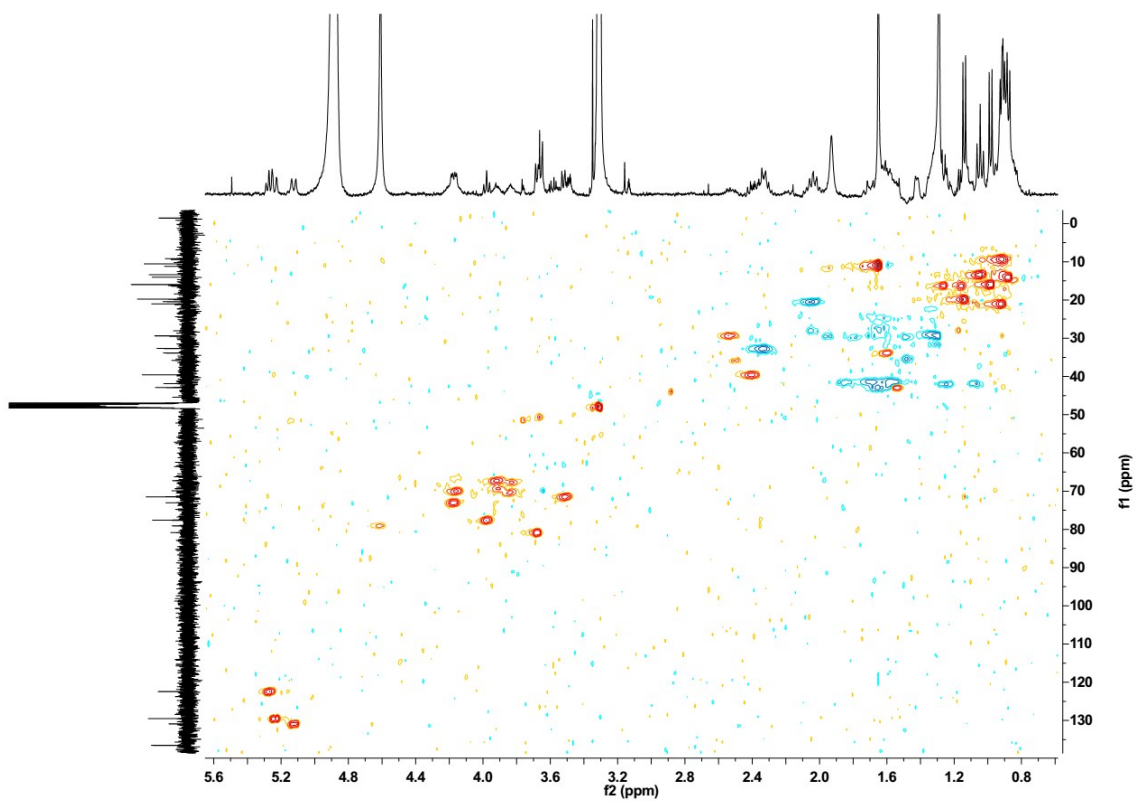

Figure MC4. The HMBC spectrum for compound 4.

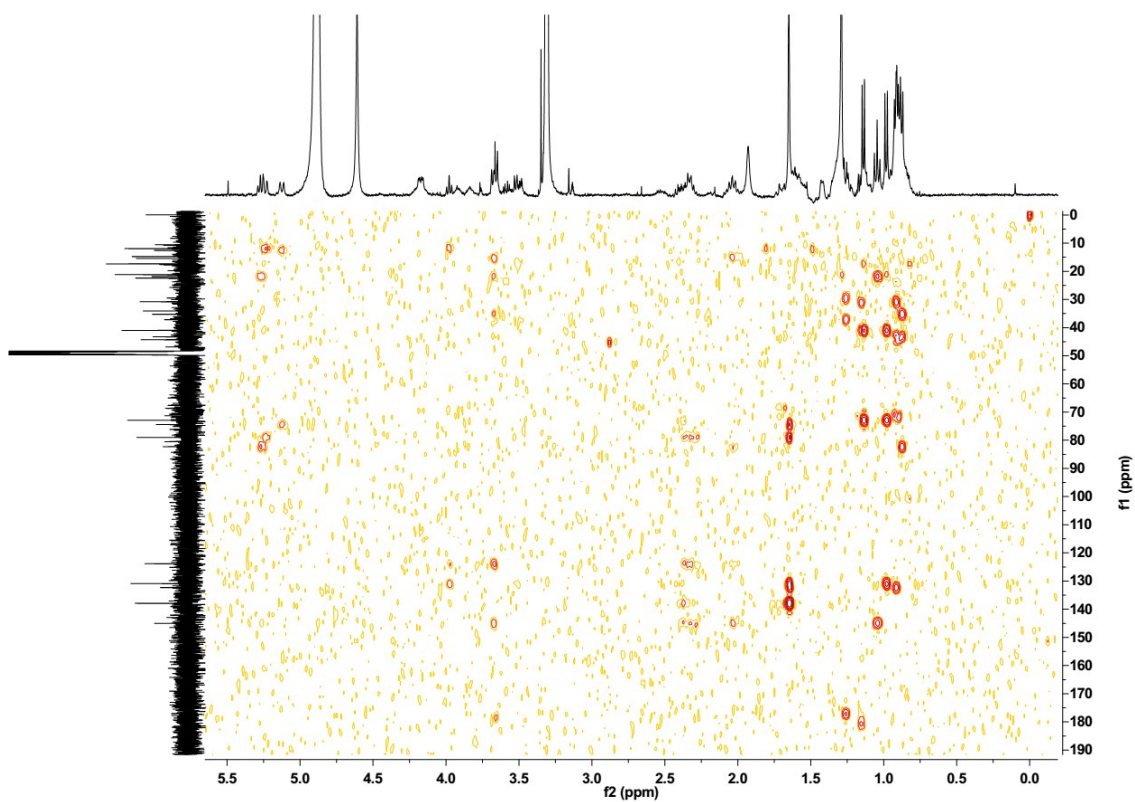

Figure MC5.  $^1\text{H}/^1\text{H}$  COSY spectrum for compound 4.

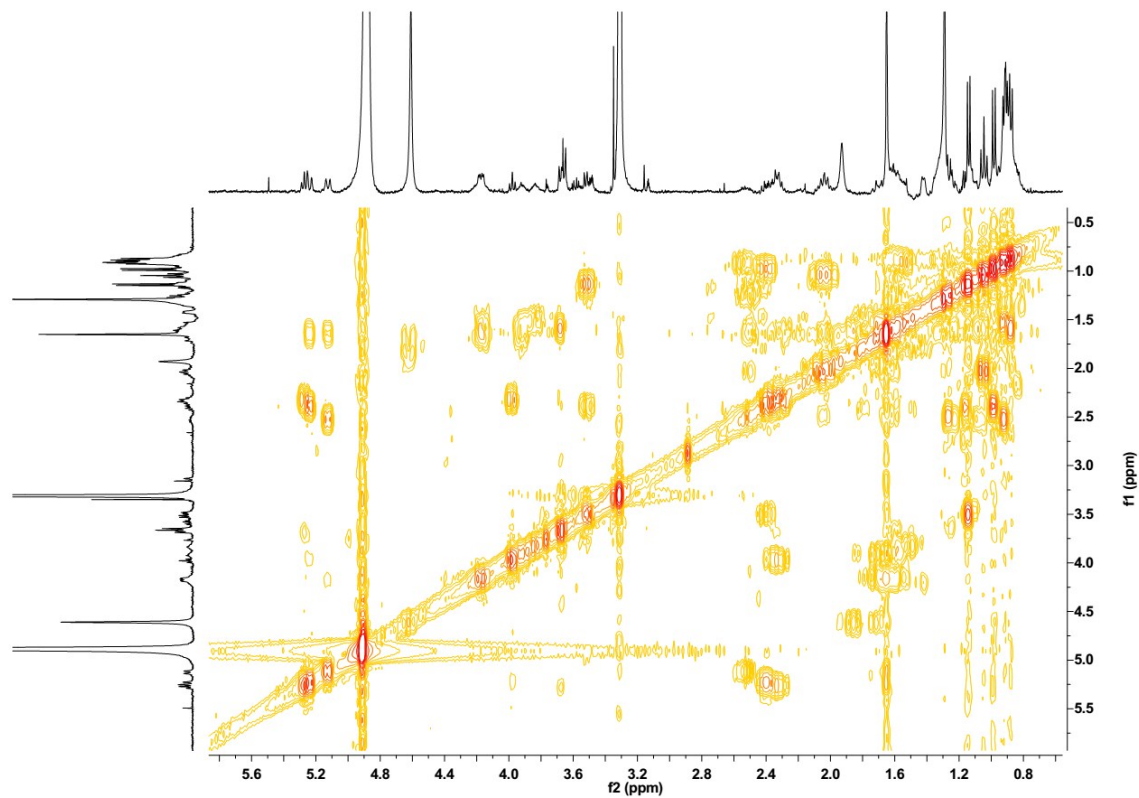

**Figure MC6.** The HRMS-ESI spectrum for compound 4.

liumeng\_L1#8-13 RT: 0.19-0.32 AV: 6 SB: 2 0.10 , 0.67 NL: 7.63E6  
T: FTMS + pESI Full ms [200.00-1200.00]

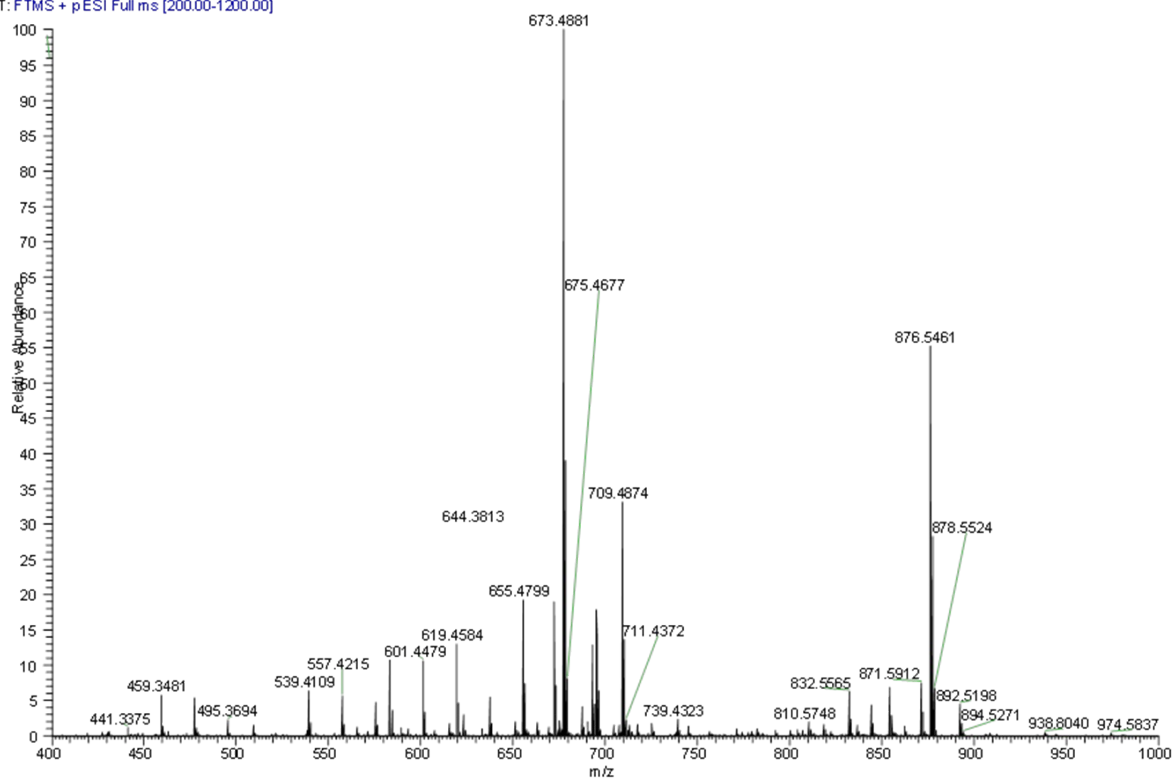

**Figure MD1.**  $^1\text{H}$  NMR (600 MHz,  $\text{CD}_3\text{OD}$ ) spectrum for compound 5.

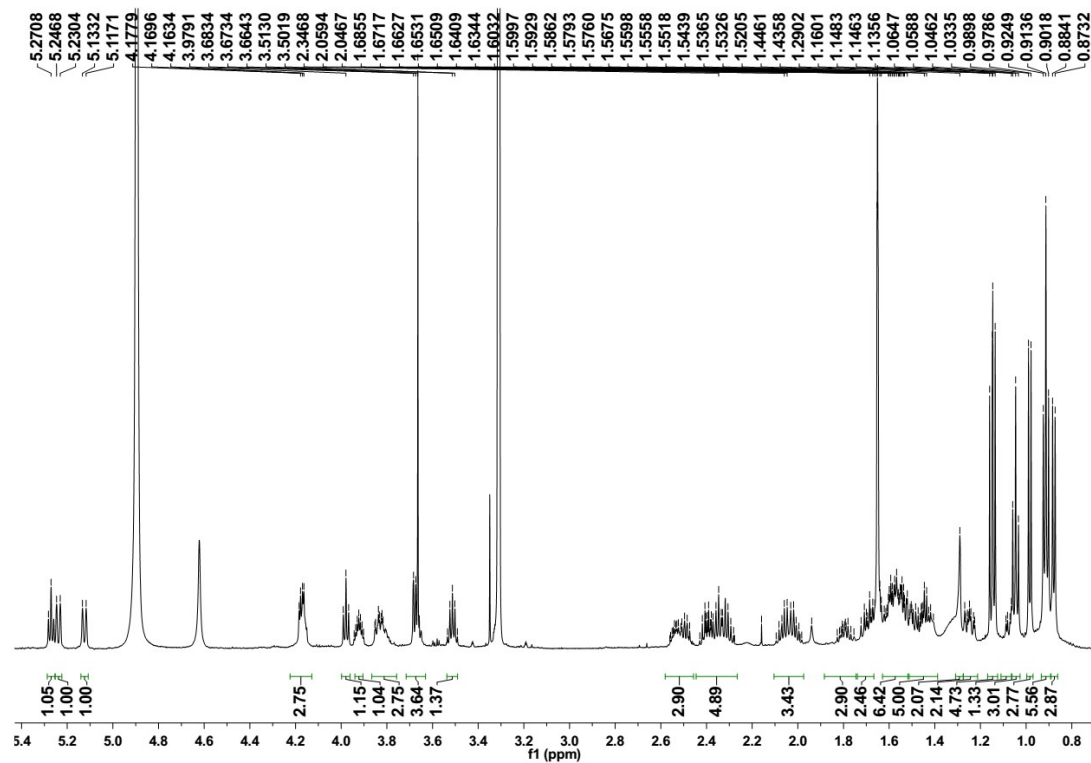

Figure MD2.  $^{13}\text{C}$  NMR (151 MHz,  $\text{CD}_3\text{OD}$ ) spectrum for compound 5.

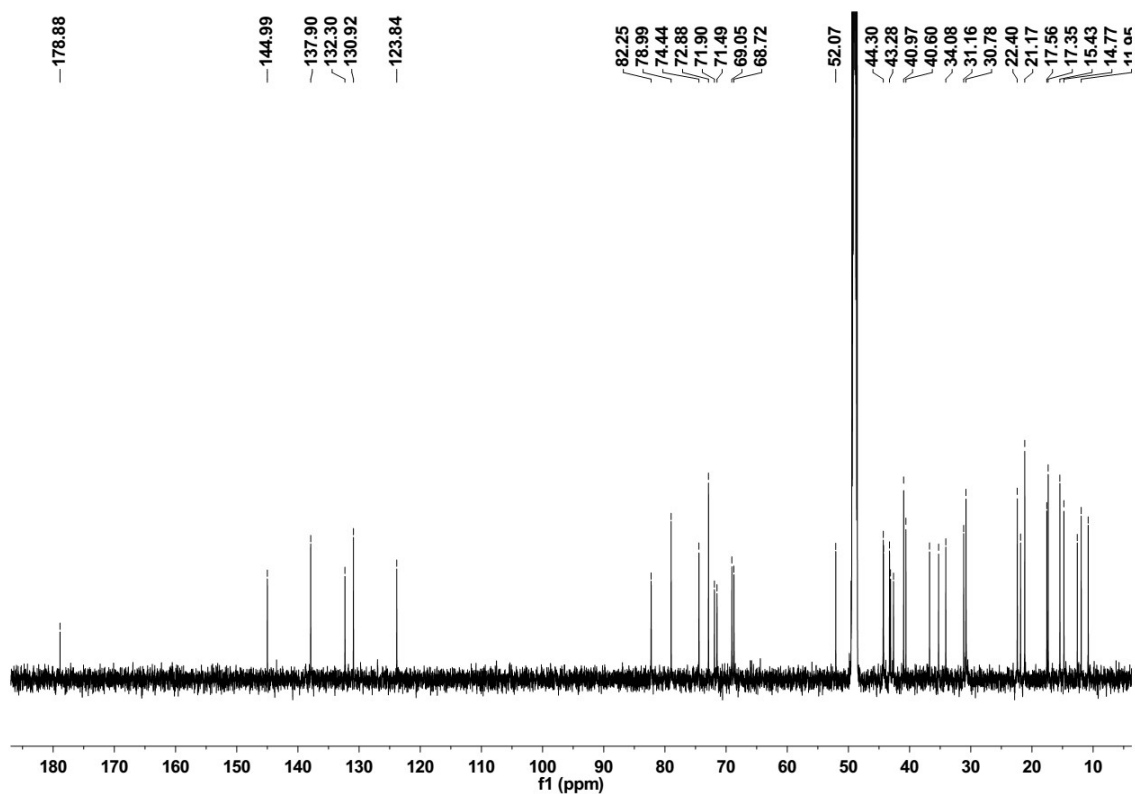

Figure MD3. The HSQC spectrum for compound 5.

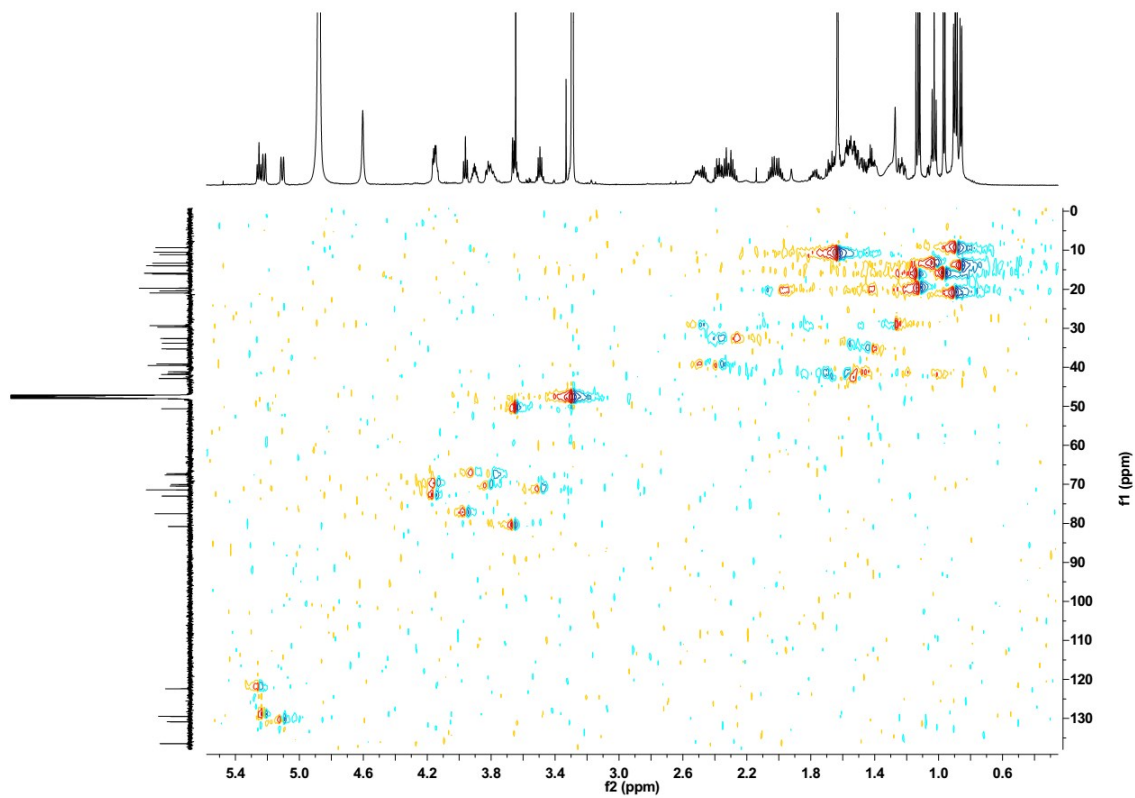

Figure MD4. The HMBC spectrum for compound 5.

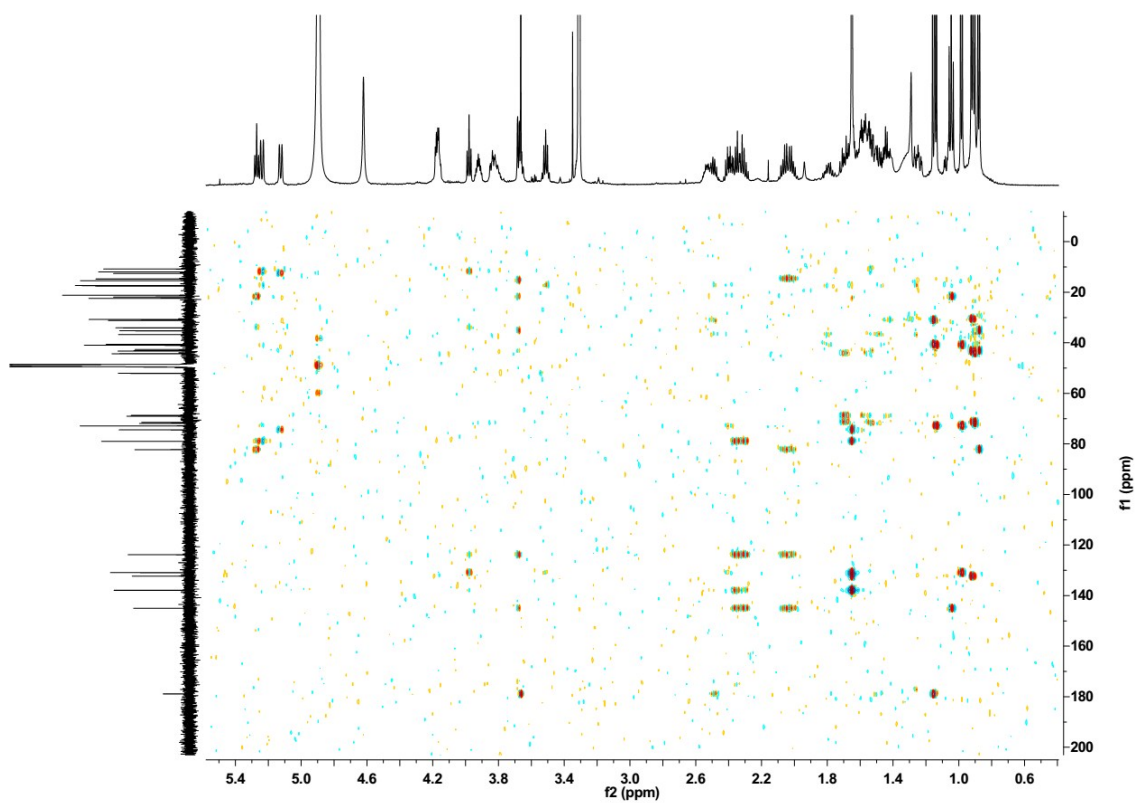

Figure MD5.  $^1\text{H}/^1\text{H}$  COSY spectrum for compound 5.

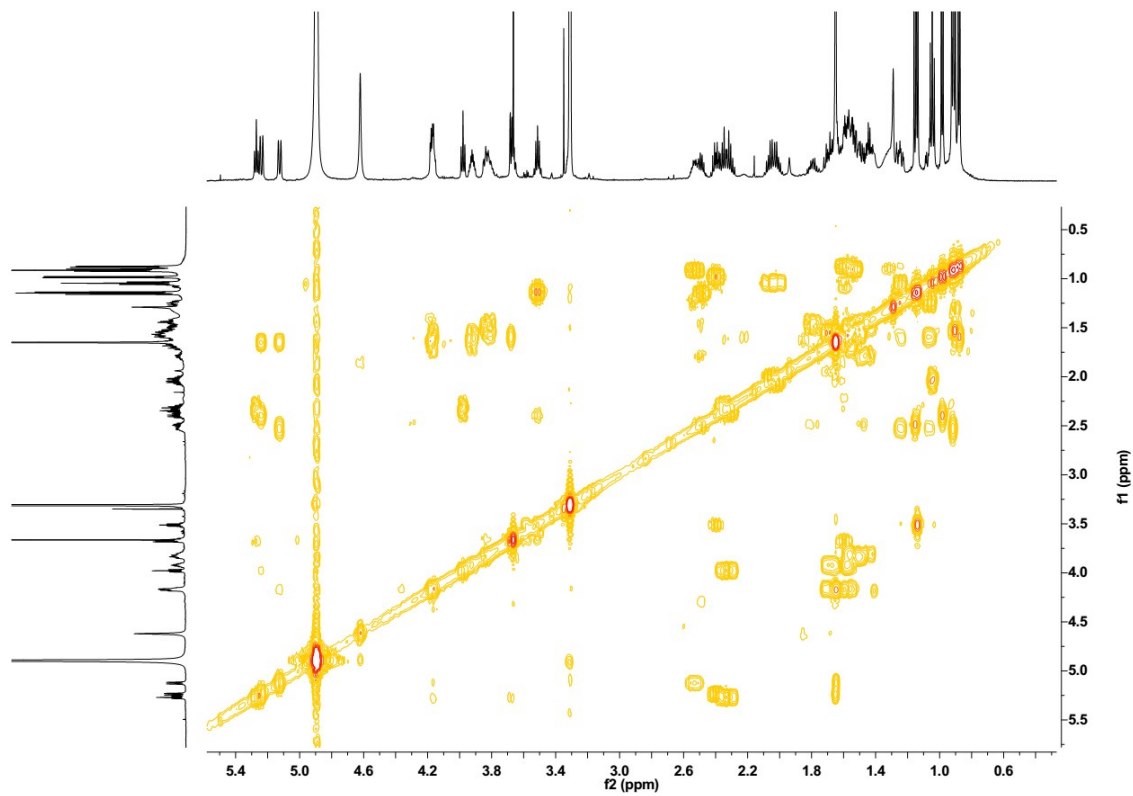

**Figure MD6.** The HRMS-ESI spectrum for compound **5**.

5-L2#11 RT: 0.30 AV: 1 NL: 2.45E6  
T: FTMS + c ESI Full ms [300.00-1000.00]

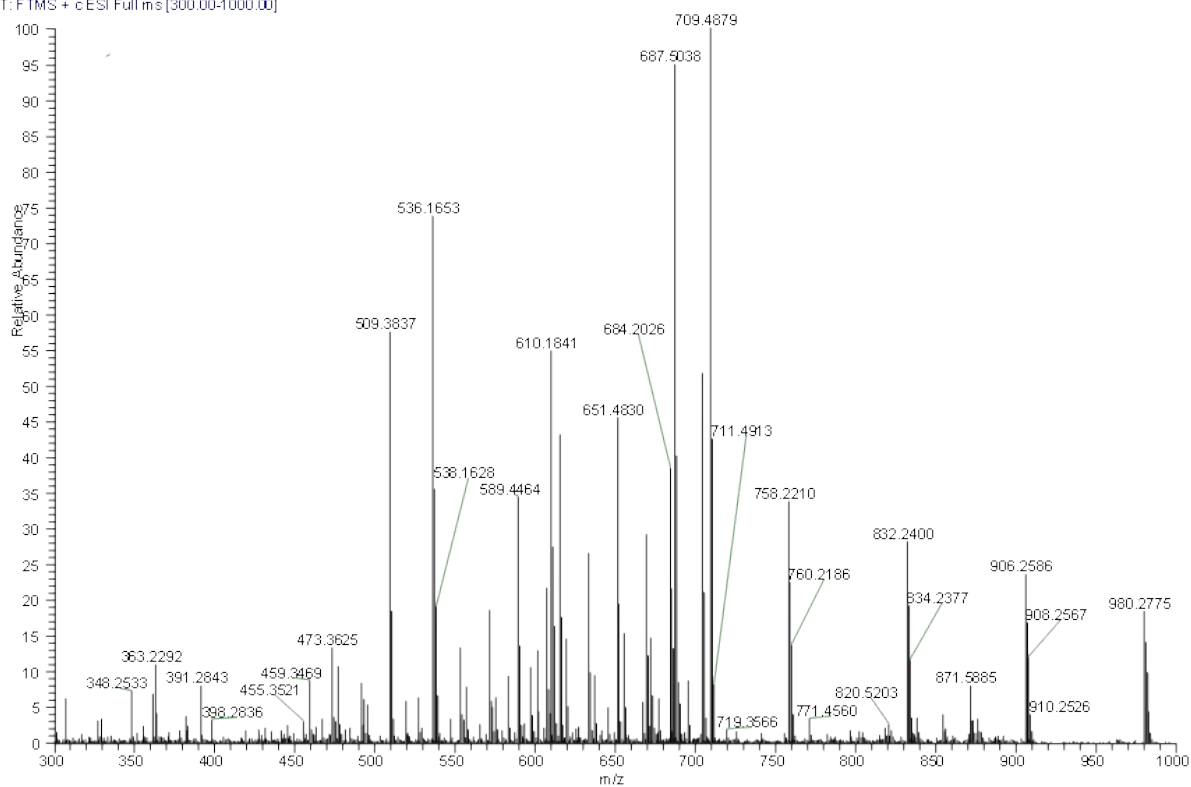

Supplement: c6ra09772c1.pdf [file c6ra09772c1.pdf]
